# Supplementary material
Source: publisher figshare collection journal article supplement (https://frontiersin.figshare.com/ndownloader/files/35512733)
Supplement: Supplementary file 1 [file 35512733]

case_study_ID	original_name	latitude	longitude	latabs_all [�]	climate_zone	margin_type	plate_boundary_type	S2S_setting	oceanographic_setting	oceanographic_region	cn_type	SDmin_all [m]	SDmax_all [m]	L_all [km]	Wmax_all [km]	Wav_all [km]	Dmax_all [m]	Dav_all [m]	lw_max_ratio_all [-]	wd_max_ratio_all [-]	ld_max_ratio_all [-]	SI_all [-]	thGav_all [�]	SWmax_all [�]	Dismin_all [km]	Lfls_all [km]	Qfls_all [km3/yr]	Aflsc_all [10^3km2]	Hflsc_all [m]	Wsh_all [km]	Gsh_all [�]	Dsh_all [m]	Wsl [km]	Gsl_all [�]	Dsl_all [m]
1	Canyon #0	-45.8	-59.1	45.8	temperate	passive margin	#NV	continental	open sea	S Atlantic Ocean	slope-confined	510.0	3500.0	126.1	#NV	#NV	#NV	#NV	#NV	#NV	#NV	1.2	0.9	#NV	592.0	#NV	#NV	#NV	#NV	522.0	0.0	145.0	#NV	2.0	3350.0
1	Canyon #1	-45.8	-59.1	45.8	temperate	passive margin	#NV	continental	open sea	S Atlantic Ocean	slope-confined	510.0	3500.0	120.6	#NV	#NV	#NV	#NV	#NV	#NV	#NV	1.2	1.3	#NV	590.0	#NV	#NV	#NV	#NV	678.0	0.0	145.0	#NV	2.0	3350.0
1	Canyon #2	-45.8	-59.1	45.8	temperate	passive margin	#NV	continental	open sea	S Atlantic Ocean	slope-confined	560.0	3500.0	93.5	#NV	#NV	#NV	#NV	#NV	#NV	#NV	1.2	2.9	#NV	640.0	#NV	#NV	#NV	#NV	812.0	0.0	145.0	#NV	2.0	3350.0
1	Canyon #3A	-45.8	-59.1	45.8	temperate	passive margin	#NV	continental	open sea	S Atlantic Ocean	slope-confined	670.0	3500.0	90.2	#NV	#NV	#NV	#NV	#NV	#NV	#NV	1.3	2.1	#NV	612.0	#NV	#NV	#NV	#NV	785.0	0.0	145.0	#NV	2.0	3350.0
1	Canyon #3B	-45.8	-59.1	45.8	temperate	passive margin	#NV	continental	open sea	S Atlantic Ocean	slope-confined	710.0	3500.0	95.6	#NV	#NV	#NV	#NV	#NV	#NV	#NV	1.3	2.0	#NV	619.0	#NV	#NV	#NV	#NV	802.0	0.0	145.0	#NV	2.0	3350.0
1	Canyon #4	-45.8	-59.1	45.8	temperate	passive margin	#NV	continental	open sea	S Atlantic Ocean	slope-confined	620.0	3500.0	108.6	#NV	#NV	#NV	#NV	#NV	#NV	#NV	1.2	1.4	#NV	600.0	#NV	#NV	#NV	#NV	768.0	0.0	145.0	#NV	2.0	3350.0
1	Canyon #5	-45.8	-59.1	45.8	temperate	passive margin	#NV	continental	open sea	S Atlantic Ocean	slope-confined	670.0	3500.0	90.6	#NV	#NV	#NV	#NV	#NV	#NV	#NV	1.2	1.9	#NV	585.0	#NV	#NV	#NV	#NV	720.0	0.0	145.0	#NV	2.0	3350.0
1	Canyon #6	-45.8	-59.1	45.8	temperate	passive margin	#NV	continental	open sea	S Atlantic Ocean	shelf-incising	125.0	3500.0	82.5	#NV	#NV	#NV	#NV	#NV	#NV	#NV	1.1	2.3	#NV	586.0	#NV	#NV	#NV	#NV	617.0	0.0	145.0	#NV	2.0	3350.0
2	Mar del Plata Canyon	-37.8	-54.1	37.8	temperate	passive margin	#NV	continental	open sea	S Atlantic Ocean	slope-confined	1000.0	3900.0	110.0	18.0	#NV	1500.0	#NV	6.1	12.0	73.3	#NV	#NV	30.0	250.0	#NV	#NV	#NV	#NV	174.0	#NV	#NV	180.0	1.1	3500.0
3	Areia Branca Canyon	-4.3	-36.5	4.3	tropical	passive margin	#NV	continental	open sea	S Atlantic Ocean	shelf-incising	163.0	1383.0	20.1	3.5	1.6	390.0	331.0	5.7	9.0	51.4	1.3	5.0	35.0	38.0	#NV	#NV	#NV	#NV	50.0	0.1	70.0	10.0	7.0	#NV
3	Grossos Canyon	-4.3	-36.5	4.3	tropical	passive margin	#NV	continental	open sea	S Atlantic Ocean	#NV	115.0	950.0	6.4	1.9	1.4	313.0	264.0	3.3	6.2	20.5	1.1	8.0	#NV	39.3	#NV	#NV	#NV	#NV	50.0	0.1	70.0	10.0	7.0	#NV
3	ABd1	-4.3	-36.5	4.3	tropical	passive margin	#NV	continental	open sea	S Atlantic Ocean	slope-confined	642.0	#NV	4.5	1.8	1.6	150.0	142.0	2.6	11.7	30.0	1.0	3.0	#NV	45.9	#NV	#NV	#NV	#NV	50.0	0.1	70.0	10.0	7.0	#NV
3	ABd2	-4.3	-36.5	4.3	tropical	passive margin	#NV	continental	open sea	S Atlantic Ocean	slope-confined	796.0	#NV	3.7	1.6	1.5	238.0	216.0	2.4	6.6	15.6	1.0	2.0	#NV	46.2	#NV	#NV	#NV	#NV	50.0	0.1	70.0	10.0	7.0	#NV
3	Mossor� Canyon	-4.3	-36.5	4.3	tropical	passive margin	#NV	continental	open sea	S Atlantic Ocean	#NV	#NV	1330.0	13.2	3.4	2.6	435.0	369.0	3.8	7.9	30.4	1.2	7.0	#NV	39.1	#NV	#NV	#NV	#NV	50.0	0.1	70.0	10.0	7.0	#NV
3	Apodi Canyon	-4.3	-36.5	4.3	tropical	passive margin	#NV	continental	open sea	S Atlantic Ocean	shelf-incising	106.0	1415.0	14.5	5.2	3.2	486.0	373.0	2.8	10.7	29.8	1.1	6.0	#NV	36.3	220.0	#NV	14.3	#NV	50.0	0.1	70.0	10.0	7.0	#NV
3	Ponta do Mel Canyon	-4.3	-36.5	4.3	tropical	passive margin	#NV	continental	open sea	S Atlantic Ocean	slope-confined	115.0	#NV	9.9	2.3	1.4	486.0	293.0	4.4	4.7	20.3	1.1	8.0	#NV	38.7	#NV	#NV	#NV	#NV	50.0	0.1	70.0	10.0	7.0	#NV
3	Porto do Mangue Canyon	-4.3	-36.5	4.3	tropical	passive margin	#NV	continental	open sea	S Atlantic Ocean	slope-confined	115.0	#NV	10.8	1.9	1.2	272.0	261.0	5.7	7.0	39.7	1.1	7.0	#NV	38.2	#NV	#NV	#NV	#NV	50.0	0.1	70.0	10.0	7.0	#NV
3	Macau Canyon	-4.3	-36.5	4.3	tropical	passive margin	#NV	continental	open sea	S Atlantic Ocean	slope-confined	120.0	#NV	11.4	3.8	3.1	370.0	360.0	3.0	10.2	30.9	1.0	6.0	#NV	38.6	#NV	#NV	#NV	#NV	50.0	0.1	70.0	10.0	7.0	#NV
3	A�u Canyon	-4.3	-36.5	4.3	tropical	passive margin	#NV	continental	open sea	S Atlantic Ocean	shelf-incising	108.0	#NV	14.5	6.2	1.5	319.0	252.0	2.3	19.5	45.5	1.2	5.0	#NV	39.9	405.0	#NV	44.0	#NV	50.0	0.1	70.0	10.0	7.0	#NV
3	A�d Canyon	-4.3	-36.5	4.3	tropical	passive margin	#NV	continental	open sea	S Atlantic Ocean	slope-confined	858.0	#NV	5.3	2.4	0.9	191.0	172.0	2.2	12.7	27.6	1.1	3.0	#NV	47.1	#NV	#NV	#NV	#NV	50.0	0.1	70.0	10.0	7.0	#NV
3	Pontal do Anjo incision	-4.3	-36.5	4.3	tropical	passive margin	#NV	continental	open sea	S Atlantic Ocean	slope-confined	613.0	#NV	6.2	#NV	0.9	191.0	#NV	#NV	#NV	32.5	1.0	#NV	#NV	41.6	#NV	#NV	#NV	#NV	50.0	0.1	70.0	10.0	7.0	#NV
3	Redonda incision	-4.3	-36.5	4.3	tropical	passive margin	#NV	continental	open sea	S Atlantic Ocean	slope-confined	#NV	#NV	6.0	1.0	#NV	150.0	#NV	6.0	6.7	39.9	#NV	#NV	#NV	42.6	#NV	#NV	#NV	#NV	50.0	0.1	70.0	10.0	7.0	#NV
3	Rosado incision	-4.3	-36.5	4.3	tropical	passive margin	#NV	continental	open sea	S Atlantic Ocean	slope-confined	#NV	#NV	5.0	1.0	#NV	150.0	#NV	5.0	6.7	33.1	1.0	#NV	#NV	43.3	#NV	#NV	#NV	#NV	50.0	0.1	70.0	10.0	7.0	#NV
4	Congo Canyon	-6.0	12.6	6.0	tropical	passive margin	#NV	continental	open sea	S Atlantic Ocean	shelf-incising	0.1	1750.0	200.0	15.0	#NV	1300.0	#NV	13.3	11.5	153.8	#NV	#NV	#NV	0.0	4700.0	1300.0	3800.0	1100.0	70.0	0.0	250.0	#NV	#NV	#NV
5	Mahin Canyon	6.0	4.5	6.0	tropical	passive margin	#NV	continental	open sea	S Atlantic Ocean	shelf-incising	#NV	2300.0	130.4	#NV	#NV	#NV	#NV	#NV	#NV	#NV	#NV	#NV	#NV	24.6	#NV	#NV	#NV	#NV	#NV	#NV	#NV	#NV	#NV	#NV
5	Avon Canyon	6.3	3.9	6.3	tropical	passive margin	#NV	continental	open sea	S Atlantic Ocean	shelf-incising	#NV	#NV	#NV	#NV	#NV	718.0	#NV	#NV	#NV	#NV	#NV	#NV	#NV	12.5	#NV	#NV	#NV	#NV	#NV	#NV	#NV	#NV	#NV	#NV
6	Aguja Canyon	11.6	-74.2	11.6	tropical	active margin	complex	continental	semi-enclosed and enclosed sea	N Atlantic Ocean	shelf-incising	10.0	3200.0	115.0	9.5	#NV	#NV	#NV	12.0	#NV	#NV	1.4	2.2	#NV	1.6	#NV	#NV	#NV	#NV	4.3	#NV	#NV	#NV	#NV	#NV
7	Muertos Canyon	17.9	-66.6	17.9	tropical	active margin	convergent	insular	semi-enclosed and enclosed sea	N Atlantic Ocean	shelf-incising	#NV	1550.0	18.3	#NV	#NV	#NV	#NV	#NV	#NV	#NV	#NV	#NV	#NV	4.7	19.6	#NV	#NV	#NV	6.3	0.2	20.0	#NV	#NV	5000.0
7	Cuchara Canyon	17.9	-66.7	17.9	tropical	active margin	convergent	insular	semi-enclosed and enclosed sea	N Atlantic Ocean	shelf-incising	#NV	1900.0	21.0	#NV	#NV	#NV	#NV	#NV	#NV	#NV	1.0	5.3	#NV	3.0	#NV	#NV	#NV	#NV	2.6	0.4	20.0	#NV	#NV	5000.0
7	Gu�nica Canyon	17.9	-66.9	17.9	tropical	active margin	convergent	insular	semi-enclosed and enclosed sea	N Atlantic Ocean	shelf-incising	12.0	#NV	22.3	#NV	#NV	#NV	#NV	#NV	#NV	#NV	1.0	#NV	#NV	2.9	17.7	#NV	#NV	#NV	1.9	0.7	23.5	#NV	#NV	5000.0
7	Guayanilla Canyon	17.9	-66.8	17.9	tropical	active margin	convergent	insular	semi-enclosed and enclosed sea	N Atlantic Ocean	shelf-incising	#NV	3300.0	#NV	#NV	#NV	#NV	#NV	#NV	#NV	#NV	#NV	#NV	#NV	2.6	74.0	#NV	#NV	#NV	3.5	0.3	20.0	#NV	#NV	5000.0
8	Arecibo Canyon	18.5	-66.8	18.5	tropical	active margin	convergent	insular	open sea	N Atlantic Ocean	shelf-incising	0.1	1400.0	#NV	#NV	#NV	#NV	#NV	#NV	#NV	#NV	#NV	3.8	#NV	#NV	64.0	0.1	0.5	1300.0	2.0	2.9	100.0	#NV	0.2	7200.0
8	Quebradillas Canyon	18.5	-67.0	18.5	tropical	active margin	convergent	insular	open sea	N Atlantic Ocean	#NV	0.1	1500.0	#NV	#NV	#NV	#NV	#NV	#NV	#NV	#NV	#NV	4.0	#NV	#NV	#NV	#NV	#NV	#NV	2.0	2.9	100.0	#NV	0.6	7200.0
9	Mona Canyon	18.5	-67.2	18.5	tropical	active margin	convergent	insular	open sea	N Atlantic Ocean	#NV	#NV	7800.0	140.0	30.0	#NV	3500.0	#NV	4.7	8.6	40.0	#NV	3.3	50.0	#NV	#NV	#NV	#NV	#NV	#NV	#NV	#NV	#NV	#NV	7500.0
10	Mississippi Canyon	28.7	-90.1	28.7	temperate	passive margin	#NV	continental	semi-enclosed and enclosed sea	N Atlantic Ocean	shelf-incising	102.0	#NV	120.0	#NV	8.0	#NV	#NV	#NV	#NV	#NV	#NV	#NV	#NV	50.3	5900.0	490.0	3300.0	3700.0	90.8	#NV	#NV	#NV	#NV	#NV
11	Hudson Canyon	39.7	-72.5	39.7	temperate	passive margin	#NV	continental	open sea	N Atlantic Ocean	shelf-incising	120.0	5000.0	384.0	#NV	#NV	#NV	#NV	#NV	#NV	#NV	1.1	5.0	#NV	120.7	490.0	15.0	34.0	1600.0	165.4	0.0	90.0	#NV	#NV	2200.0
12	Oceanographer Canyon	40.5	-68.2	40.5	temperate	passive margin	#NV	continental	open sea	N Atlantic Ocean	shelf-incising	150.0	2500.0	43.6	#NV	#NV	#NV	#NV	#NV	#NV	#NV	1.1	3.0	#NV	193.3	#NV	#NV	#NV	#NV	404.1	#NV	#NV	#NV	#NV	2100.0
12	Lydonia Canyon	40.6	-67.7	40.6	temperate	passive margin	#NV	continental	open sea	N Atlantic Ocean	shelf-incising	120.0	#NV	51.2	5.0	#NV	#NV	#NV	10.2	#NV	#NV	1.1	2.4	#NV	223.5	#NV	#NV	#NV	#NV	423.4	#NV	#NV	#NV	#NV	2100.0
13	Logan Canyon	43.6	-60.1	43.6	temperate	passive margin	#NV	continental	open sea	N Atlantic Ocean	shelf-incising	100.0	3200.0	70.0	8.0	#NV	#NV	#NV	8.8	#NV	#NV	#NV	#NV	#NV	215.7	#NV	#NV	#NV	#NV	207.9	0.0	120.0	#NV	#NV	#NV
14	West Halibut Canyon	45.0	-55.2	45.0	temperate	passive margin	#NV	insular	open sea	N Atlantic Ocean	shelf-incising	200.0	2500.0	43.5	3.3	#NV	#NV	#NV	13.1	#NV	#NV	1.0	#NV	40.0	198.6	#NV	#NV	#NV	#NV	217.0	0.0	150.0	#NV	#NV	2500.0
14	East Halibut Canyon	45.0	-55.2	45.0	temperate	passive margin	#NV	insular	open sea	N Atlantic Ocean	shelf-incising	200.0	2500.0	#NV	#NV	#NV	#NV	#NV	#NV	#NV	#NV	#NV	#NV	40.0	198.7	#NV	#NV	#NV	#NV	217.0	0.0	150.0	#NV	#NV	2500.0
14	Green Canyon	45.0	-55.2	45.0	temperate	passive margin	#NV	insular	open sea	N Atlantic Ocean	slope-confined	200.0	#NV	38.6	#NV	#NV	#NV	#NV	#NV	#NV	#NV	1.1	#NV	40.0	212.6	#NV	#NV	#NV	#NV	217.0	0.0	150.0	#NV	#NV	2500.0
15	Dakar Canyon	14.6	-17.7	14.6	tropical	passive margin	#NV	continental	open sea	N Atlantic Ocean	shelf-incising	111.0	4100.0	#NV	#NV	#NV	700.0	#NV	#NV	#NV	#NV	#NV	#NV	#NV	14.0	#NV	#NV	#NV	#NV	32.0	#NV	#NV	#NV	#NV	4100.0
16	Cayar Canyon	15.0	-17.3	15.0	tropical	passive margin	#NV	continental	open sea	N Atlantic Ocean	shelf-incising	10.0	#NV	#NV	9.0	#NV	#NV	#NV	#NV	#NV	#NV	#NV	#NV	#NV	20.2	#NV	#NV	#NV	#NV	18.0	0.4	110.0	#NV	2.0	#NV
17	Timiris Canyon	19.9	-17.6	19.9	tropical	passive margin	#NV	continental	open sea	N Atlantic Ocean	shelf-incising	50.0	#NV	#NV	8.0	#NV	500.0	#NV	#NV	16.0	#NV	1.4	#NV	#NV	252.2	#NV	#NV	#NV	#NV	408.2	0.0	100.0	#NV	#NV	2750.0
18	Agadir Canyon	30.7	-10.9	30.7	temperate	passive margin	#NV	continental	open sea	N Atlantic Ocean	shelf-incising	#NV	4250.0	460.0	15.0	#NV	1500.0	#NV	30.7	10.0	306.7	#NV	#NV	#NV	18.2	#NV	#NV	#NV	#NV	27.2	#NV	#NV	#NV	#NV	3000.0
19	Faro Canyon	36.7	-8.4	36.7	temperate	passive margin	#NV	continental	open sea	N Atlantic Ocean	slope-confined	#NV	#NV	20.0	#NV	#NV	#NV	#NV	#NV	#NV	#NV	#NV	#NV	#NV	70.4	#NV	#NV	#NV	#NV	21.6	0.3	110.0	#NV	#NV	#NV
19	Portimao Canyon	36.9	-8.5	36.9	temperate	passive margin	#NV	continental	open sea	N Atlantic Ocean	shelf-incising	120.0	#NV	55.0	#NV	#NV	#NV	#NV	#NV	#NV	#NV	1.1	#NV	#NV	21.7	#NV	#NV	#NV	#NV	26.3	0.2	110.0	#NV	#NV	#NV
20	S�tubal Canyon	38.3	-8.9	38.3	temperate	passive margin	#NV	continental	open sea	N Atlantic Ocean	shelf-incising	#NV	#NV	#NV	#NV	#NV	#NV	#NV	#NV	#NV	#NV	#NV	1.5	#NV	9.2	1180.0	9.9	82.7	1500.0	24.9	1.0	#NV	#NV	6.5	4500.0
20	Cascais Canyon	38.5	-9.5	38.5	temperate	passive margin	#NV	continental	open sea	N Atlantic Ocean	shelf-incising	175.0	4600.0	90.0	#NV	#NV	#NV	#NV	#NV	#NV	#NV	1.4	#NV	#NV	22.7	#NV	#NV	#NV	#NV	25.9	1.0	#NV	#NV	6.5	4500.0
20	Lisbon Canyon	38.5	-9.3	38.5	temperate	passive margin	#NV	continental	open sea	N Atlantic Ocean	shelf-incising	#NV	2000.0	#NV	8.2	#NV	#NV	#NV	#NV	#NV	#NV	1.3	#NV	#NV	7.5	1180.0	9.9	82.7	1500.0	24.5	1.0	#NV	#NV	6.5	4500.0
20	Nazar� Canyon	39.6	-9.1	39.6	temperate	passive margin	#NV	continental	open sea	N Atlantic Ocean	shelf-incising	50.0	5000.0	210.0	10.0	#NV	#NV	#NV	21.0	#NV	#NV	#NV	1.3	#NV	0.7	#NV	#NV	#NV	#NV	#NV	1.0	#NV	#NV	6.5	4500.0
21	Avil�s Canyon	43.8	-6.2	43.8	temperate	passive margin	#NV	continental	open sea	N Atlantic Ocean	shelf-incising	128.0	4766.0	80.0	2.1	#NV	#NV	#NV	38.5	#NV	#NV	1.4	4.6	#NV	12.0	249.0	#NV	6.0	1500.0	13.0	0.9	200.0	#NV	#NV	4700.0
21	El Corbiro-La Gaviera Canyon	44.0	-6.0	44.0	temperate	passive margin	#NV	continental	open sea	N Atlantic Ocean	slope-confined	806.0	4341.0	24.9	9.5	#NV	#NV	#NV	2.6	#NV	#NV	1.4	5.1	#NV	#NV	249.0	#NV	6.0	1500.0	13.0	0.9	200.0	#NV	#NV	4700.0
21	Navia Canyon	44.0	-6.7	44.0	temperate	passive margin	#NV	continental	open sea	N Atlantic Ocean	#NV	321.0	4779.0	35.8	4.7	#NV	#NV	#NV	7.6	#NV	#NV	1.1	7.5	#NV	#NV	210.0	2.1	2.6	1000.0	#NV	#NV	200.0	#NV	#NV	4700.0
21	La Gaviera Canyon	44.1	-5.5	44.1	temperate	passive margin	#NV	continental	open sea	N Atlantic Ocean	#NV	205.0	1913.0	29.6	6.2	#NV	#NV	#NV	4.8	#NV	#NV	1.4	3.7	#NV	#NV	249.0	#NV	6.0	1500.0	13.0	0.9	200.0	#NV	#NV	4700.0
21	El Corbiro Canyon	44.0	-6.0	44.0	temperate	passive margin	#NV	continental	open sea	N Atlantic Ocean	#NV	176.0	2108.0	23.7	7.8	#NV	#NV	#NV	3.0	#NV	#NV	1.3	5.1	#NV	#NV	249.0	#NV	6.0	1500.0	13.0	0.9	200.0	#NV	#NV	4700.0
22	Capbreton Canyon	43.7	-1.5	43.7	temperate	passive margin	#NV	continental	open sea	N Atlantic Ocean	shelf-incising	10.0	3500.0	300.0	#NV	#NV	#NV	#NV	#NV	#NV	#NV	#NV	#NV	#NV	1.7	340.0	11.0	16.0	2800.0	40.9	#NV	#NV	#NV	8.0	3700.0
23	Audierne Canyon	47.2	-5.7	47.2	temperate	passive margin	#NV	continental	open sea	N Atlantic Ocean	#NV	610.0	#NV	43.4	#NV	#NV	#NV	#NV	#NV	#NV	#NV	1.0	4.5	#NV	174.9	#NV	#NV	#NV	#NV	184.6	#NV	#NV	#NV	8.0	4010.0
23	Blackmud Canyon	47.8	-7.8	47.8	temperate	passive margin	#NV	continental	open sea	N Atlantic Ocean	slope-confined	332.0	#NV	56.8	4.3	#NV	#NV	#NV	13.2	#NV	#NV	1.1	#NV	#NV	322.1	#NV	#NV	#NV	#NV	#NV	#NV	#NV	#NV	8.0	4050.0
24	Canyon 1	68.3	10.9	68.3	polar	passive margin	#NV	#NV	open sea	N Atlantic Ocean	slope-confined	500.0	1100.0	10.3	2.5	#NV	200.0	#NV	4.1	12.5	51.3	1.0	#NV	25.0	66.9	#NV	#NV	#NV	#NV	#NV	#NV	#NV	41.0	5.0	2600.0
24	Canyon 2	68.4	11.3	68.4	polar	passive margin	#NV	#NV	open sea	N Atlantic Ocean	slope-confined	500.0	1100.0	12.2	4.0	#NV	250.0	#NV	3.1	16.0	48.9	1.1	#NV	27.0	79.5	#NV	#NV	#NV	#NV	#NV	#NV	#NV	41.0	5.0	2600.0
24	Canyon 3	68.5	11.9	68.5	polar	passive margin	#NV	#NV	open sea	N Atlantic Ocean	shelf-incising	#NV	#NV	45.1	13.0	#NV	400.0	#NV	3.5	32.5	112.8	1.0	#NV	33.0	66.9	#NV	#NV	#NV	#NV	#NV	#NV	#NV	30.0	5.0	2600.0
24	Canyon 4	68.7	12.2	68.7	polar	passive margin	#NV	#NV	open sea	N Atlantic Ocean	slope-confined	600.0	#NV	30.3	15.0	#NV	450.0	#NV	2.0	33.3	67.3	1.0	#NV	35.0	67.5	#NV	#NV	#NV	#NV	#NV	#NV	#NV	30.0	5.0	2600.0
24	Canyon 5	68.7	12.7	68.7	polar	passive margin	#NV	#NV	open sea	N Atlantic Ocean	shelf-incising	#NV	#NV	37.2	8.0	#NV	500.0	#NV	4.7	16.0	74.5	#NV	#NV	35.0	57.8	#NV	#NV	#NV	#NV	#NV	#NV	#NV	30.0	5.0	2600.0
24	Canyon 6	68.9	12.7	68.9	polar	passive margin	#NV	#NV	open sea	N Atlantic Ocean	slope-confined	700.0	2500.0	27.4	11.0	#NV	400.0	#NV	2.5	27.5	68.5	1.0	#NV	40.0	66.0	#NV	#NV	#NV	#NV	#NV	#NV	#NV	30.0	5.0	2600.0
24	Canyon 7	69.0	12.6	69.0	polar	passive margin	#NV	#NV	open sea	N Atlantic Ocean	slope-confined	1500.0	2500.0	13.8	3.0	#NV	300.0	#NV	4.6	10.0	46.1	1.1	#NV	38.0	75.5	#NV	#NV	#NV	#NV	#NV	#NV	#NV	30.0	5.0	2600.0
24	Canyon 8	68.8	13.2	68.8	polar	passive margin	#NV	#NV	open sea	N Atlantic Ocean	slope-confined	#NV	#NV	28.0	15.0	#NV	1000.0	#NV	1.9	15.0	28.0	#NV	#NV	40.0	44.8	#NV	#NV	#NV	#NV	#NV	#NV	#NV	30.0	5.0	2600.0
24	Canyon 9	68.9	13.4	68.9	polar	passive margin	#NV	#NV	open sea	N Atlantic Ocean	slope-confined	#NV	#NV	18.0	6.0	#NV	300.0	#NV	3.0	20.0	60.0	#NV	#NV	30.0	43.8	#NV	#NV	#NV	#NV	#NV	#NV	#NV	30.0	5.0	2600.0
24	Canyon 10	69.0	13.6	69.0	polar	passive margin	#NV	#NV	open sea	N Atlantic Ocean	slope-confined	#NV	#NV	20.0	10.0	#NV	300.0	#NV	2.0	33.3	66.7	#NV	#NV	35.0	37.7	#NV	#NV	#NV	#NV	#NV	#NV	#NV	30.0	5.0	2600.0
24	Canyon 11	69.2	13.6	69.2	polar	passive margin	#NV	#NV	open sea	N Atlantic Ocean	slope-confined	500.0	#NV	22.0	3.0	#NV	300.0	#NV	7.3	10.0	73.3	#NV	#NV	50.0	41.8	#NV	#NV	#NV	#NV	#NV	#NV	#NV	30.0	5.0	2600.0
24	Canyon 12	69.1	14.1	69.1	polar	passive margin	#NV	#NV	open sea	N Atlantic Ocean	slope-confined	#NV	#NV	30.0	12.0	#NV	600.0	#NV	2.5	20.0	50.0	#NV	#NV	55.0	29.7	#NV	#NV	#NV	#NV	#NV	#NV	#NV	30.0	5.0	2500.0
24	Canyon 13	69.2	14.4	69.2	polar	passive margin	#NV	#NV	open sea	N Atlantic Ocean	slope-confined	#NV	#NV	35.0	6.0	#NV	400.0	#NV	5.8	15.0	87.5	#NV	#NV	41.0	27.7	#NV	#NV	#NV	#NV	#NV	#NV	#NV	30.0	5.0	2420.0
24	Canyon 14	69.3	14.8	69.3	polar	passive margin	#NV	#NV	open sea	N Atlantic Ocean	slope-confined	#NV	#NV	34.2	15.0	#NV	800.0	#NV	2.3	18.8	42.7	1.1	#NV	38.0	24.7	#NV	#NV	#NV	#NV	#NV	#NV	#NV	30.0	5.0	2430.0
24	Canyon 15/And�ya Canyon	69.3	15.8	69.3	polar	passive margin	#NV	#NV	open sea	N Atlantic Ocean	slope-confined	#NV	2300.0	38.2	10.0	#NV	1100.0	#NV	3.8	9.1	34.7	1.1	3.0	40.0	7.8	#NV	#NV	#NV	#NV	#NV	#NV	#NV	30.0	4.1	2134.0
25	Kaikoura Canyon	-42.4	173.6	42.4	temperate	active margin	convergent	insular	open sea	S Pacific Ocean	shelf-incising	18.0	2000.0	60.0	5.0	#NV	1200.0	#NV	12.0	4.2	50.0	#NV	1.9	#NV	0.5	#NV	#NV	#NV	#NV	4.0	1.4	100.0	#NV	#NV	2080.0
26	Lachlan Canyon	-39.0	178.1	39.0	temperate	active margin	convergent	insular	open sea	S Pacific Ocean	shelf-incising	#NV	#NV	#NV	4.0	#NV	400.0	#NV	#NV	10.0	#NV	#NV	#NV	#NV	20.2	#NV	#NV	#NV	#NV	35.6	#NV	#NV	51.4	3.8	3400.0
27	Biob�o Canyon (main trunk)	-36.8	-73.2	36.8	temperate	active margin	convergent	continental	open sea	S Pacific Ocean	shelf-incising	15.0	4500.0	126.6	6.0	#NV	#NV	#NV	21.1	#NV	#NV	1.3	2.7	#NV	1.1	380.0	33.0	24.0	2000.0	37.9	#NV	#NV	#NV	#NV	4520.0
27	Biob�o Canyon tributary	-36.9	-73.5	36.9	temperate	active margin	convergent	#NV	open sea	S Pacific Ocean	shelf-incising	120.0	700.0	10.0	5.8	#NV	#NV	#NV	1.7	#NV	#NV	1.0	#NV	#NV	28.9	#NV	#NV	#NV	#NV	42.5	#NV	#NV	#NV	#NV	4520.0
28	San Antonio Canyon	-33.5	-71.9	33.5	temperate	active margin	convergent	continental	open sea	S Pacific Ocean	shelf-incising	#NV	#NV	150.0	15.0	#NV	#NV	#NV	10.0	#NV	#NV	1.3	2.4	#NV	19.7	230.0	3.8	15.0	5600.0	21.0	#NV	#NV	#NV	4.0	5500.0
29	Canyon C	-18.1	-71.2	18.1	tropical	active margin	convergent	continental	open sea	S Pacific Ocean	#NV	#NV	#NV	36.5	#NV	#NV	#NV	#NV	#NV	#NV	#NV	1.2	#NV	#NV	#NV	#NV	#NV	#NV	#NV	6.5	#NV	#NV	#NV	#NV	7000.0
29	Canyon B	-17.9	-71.5	17.9	tropical	active margin	convergent	continental	open sea	S Pacific Ocean	#NV	#NV	#NV	50.0	#NV	#NV	100.0	#NV	#NV	#NV	499.9	1.2	#NV	#NV	#NV	#NV	#NV	#NV	#NV	6.5	#NV	#NV	#NV	#NV	7000.0
29	East Arequipa Basin Canyon	-17.7	-71.5	17.7	tropical	active margin	convergent	continental	open sea	S Pacific Ocean	shelf-incising	#NV	7000.0	#NV	1.1	#NV	#NV	#NV	#NV	#NV	#NV	2.0	#NV	#NV	#NV	#NV	#NV	#NV	#NV	6.5	#NV	#NV	#NV	#NV	7000.0
30	Guayaquil Canyon	-2.9	-81.0	2.9	tropical	active margin	convergent	continental	open sea	S Pacific Ocean	shelf-incising	#NV	#NV	70.0	#NV	#NV	#NV	#NV	#NV	#NV	#NV	#NV	#NV	#NV	65.3	390.0	37.0	32.0	3000.0	50.0	0.2	160.0	#NV	#NV	#NV
30	Santa Elena Canyon	-2.0	-81.1	2.0	tropical	active margin	convergent	continental	open sea	S Pacific Ocean	shelf-incising	#NV	#NV	40.0	#NV	#NV	700.0	#NV	#NV	#NV	57.1	#NV	#NV	#NV	19.3	#NV	#NV	#NV	#NV	#NV	#NV	140.0	#NV	#NV	#NV
31	Canyon 19	-15.7	145.8	15.7	tropical	passive margin	#NV	continental	open sea	S Pacific Ocean	shelf-incising	70.0	1781.0	6.0	3.9	3.2	681.6	#NV	1.6	5.7	8.8	1.0	0.8	24.6	47.6	#NV	#NV	#NV	#NV	50.7	0.1	85.0	#NV	#NV	#NV
31	Canyon 18	-15.7	145.8	15.7	tropical	passive margin	#NV	continental	open sea	S Pacific Ocean	shelf-incising	84.0	1746.0	3.2	4.4	3.7	570.3	#NV	0.7	7.7	5.5	1.0	3.3	17.3	48.4	#NV	#NV	#NV	#NV	45.8	0.1	85.0	#NV	#NV	#NV
31	Canyon 17	-15.7	145.8	15.7	tropical	passive margin	#NV	continental	open sea	S Pacific Ocean	shelf-incising	73.0	1771.0	6.5	3.4	2.9	463.8	#NV	1.9	7.4	13.9	1.0	3.0	17.7	49.8	#NV	#NV	#NV	#NV	51.3	0.1	85.0	#NV	#NV	#NV
31	Canyon 16	-15.6	145.8	15.6	tropical	passive margin	#NV	continental	open sea	S Pacific Ocean	shelf-incising	83.0	1766.0	12.2	2.9	1.9	430.0	#NV	4.2	6.7	28.4	1.1	11.4	32.0	51.3	#NV	#NV	#NV	#NV	52.3	0.1	85.0	#NV	#NV	#NV
31	Canyon 15	-15.6	145.8	15.6	tropical	passive margin	#NV	continental	open sea	S Pacific Ocean	shelf-incising	135.0	1791.0	11.3	2.5	1.6	395.7	#NV	4.5	6.3	28.4	1.1	13.2	35.4	52.6	#NV	#NV	#NV	#NV	51.3	0.1	85.0	#NV	#NV	#NV
31	Canyon 14	-15.6	145.8	15.6	tropical	passive margin	#NV	continental	open sea	S Pacific Ocean	shelf-incising	78.0	1902.0	13.4	3.8	2.3	568.1	#NV	3.6	6.6	23.7	1.1	8.9	36.4	53.3	#NV	#NV	#NV	#NV	52.0	0.1	85.0	#NV	#NV	#NV
31	Canyon 13	-15.5	145.8	15.5	tropical	passive margin	#NV	continental	open sea	S Pacific Ocean	shelf-incising	70.0	1768.0	11.4	6.5	4.5	506.0	#NV	1.8	12.8	22.5	1.1	10.9	23.2	53.4	#NV	#NV	#NV	#NV	56.8	0.1	85.0	#NV	#NV	#NV
31	Canyon 12	-15.5	145.8	15.5	tropical	passive margin	#NV	continental	open sea	S Pacific Ocean	slope-confined	666.0	1759.0	6.6	2.3	1.5	347.2	#NV	2.9	6.5	19.1	1.0	9.2	24.0	56.2	#NV	#NV	#NV	#NV	58.1	0.1	85.0	#NV	#NV	#NV
31	Canyon 11	-15.5	145.9	15.5	tropical	passive margin	#NV	continental	open sea	S Pacific Ocean	slope-confined	1041.0	1683.0	6.4	3.9	2.3	422.6	#NV	1.6	9.2	15.1	1.1	5.9	19.0	57.4	#NV	#NV	#NV	#NV	59.6	0.1	85.0	#NV	#NV	#NV
31	Canyon 10	-15.4	145.8	15.4	tropical	passive margin	#NV	continental	open sea	S Pacific Ocean	slope-confined	478.0	1822.0	7.5	2.1	1.5	327.7	#NV	3.7	6.3	22.9	1.1	12.1	27.6	53.6	#NV	#NV	#NV	#NV	61.0	0.1	85.0	#NV	#NV	#NV
31	Canyon 9	-15.4	145.8	15.4	tropical	passive margin	#NV	continental	open sea	S Pacific Ocean	slope-confined	821.0	1934.0	7.1	3.4	2.5	380.4	#NV	2.1	8.9	18.6	1.1	9.4	13.4	51.6	#NV	#NV	#NV	#NV	57.5	0.1	85.0	#NV	#NV	#NV
31	Canyon 7	-15.3	145.8	15.3	tropical	passive margin	#NV	continental	open sea	S Pacific Ocean	shelf-incising	65.0	1825.0	12.4	3.0	1.9	352.9	#NV	4.1	8.6	35.0	1.0	13.9	28.2	48.4	#NV	#NV	#NV	#NV	51.7	0.1	85.0	#NV	#NV	#NV
31	Canyon 5	-15.2	145.8	15.2	tropical	passive margin	#NV	continental	open sea	S Pacific Ocean	shelf-incising	61.0	2210.0	30.0	5.9	3.7	720.1	#NV	5.1	8.2	41.7	1.1	9.8	26.8	44.4	#NV	#NV	#NV	#NV	42.5	0.1	85.0	#NV	#NV	#NV
31	Canyon 3	-15.1	145.8	15.1	tropical	passive margin	#NV	continental	open sea	S Pacific Ocean	shelf-incising	68.0	2192.0	20.5	6.0	4.4	739.3	#NV	3.4	8.1	27.7	1.2	8.0	27.8	46.3	#NV	#NV	#NV	#NV	50.6	0.1	85.0	#NV	#NV	#NV
31	Canyon 2	-15.0	145.8	15.0	tropical	passive margin	#NV	continental	open sea	S Pacific Ocean	shelf-incising	66.0	2144.0	14.6	4.8	3.4	618.2	#NV	3.0	7.8	23.6	1.3	3.9	39.6	44.0	#NV	#NV	#NV	#NV	47.0	0.1	85.0	#NV	#NV	#NV
32	Oro Canyon	-8.9	150.0	8.9	tropical	active margin	convergent	insular	semi-enclosed and enclosed sea	S Pacific Ocean	shelf-incising	0.1	5700.0	84.0	#NV	#NV	#NV	#NV	#NV	#NV	#NV	#NV	#NV	#NV	#NV	#NV	#NV	#NV	#NV	#NV	#NV	#NV	#NV	#NV	5000.0
32	Binandere Canyon	-8.2	148.2	8.2	tropical	active margin	convergent	insular	semi-enclosed and enclosed sea	S Pacific Ocean	shelf-incising	0.1	5950.0	105.0	#NV	#NV	#NV	#NV	#NV	#NV	#NV	#NV	#NV	#NV	4.3	#NV	#NV	#NV	#NV	#NV	#NV	#NV	#NV	#NV	5000.0
32	Gira Canyon	-7.9	148.0	7.9	tropical	active margin	convergent	insular	semi-enclosed and enclosed sea	S Pacific Ocean	shelf-incising	0.1	4000.0	53.0	#NV	#NV	#NV	#NV	#NV	#NV	#NV	#NV	#NV	#NV	#NV	#NV	#NV	#NV	#NV	#NV	#NV	#NV	#NV	#NV	5000.0
32	Eia Canyon	-7.9	147.9	7.9	tropical	active margin	convergent	insular	semi-enclosed and enclosed sea	S Pacific Ocean	shelf-incising	0.1	1500.0	13.0	#NV	#NV	#NV	#NV	#NV	#NV	#NV	#NV	#NV	#NV	2.0	#NV	#NV	#NV	#NV	#NV	#NV	#NV	#NV	#NV	5000.0
32	Waria Canyon	-7.7	147.7	7.7	tropical	active margin	convergent	insular	semi-enclosed and enclosed sea	S Pacific Ocean	shelf-incising	0.1	4000.0	49.0	#NV	#NV	#NV	#NV	#NV	#NV	#NV	#NV	#NV	#NV	#NV	90.0	#NV	#NV	#NV	#NV	#NV	#NV	#NV	#NV	5000.0
32	Gira Waria Canyon	-7.4	148.0	7.4	tropical	active margin	convergent	insular	semi-enclosed and enclosed sea	S Pacific Ocean	slope-confined	4000.0	5000.0	46.0	#NV	#NV	#NV	#NV	#NV	#NV	#NV	#NV	#NV	#NV	57.0	#NV	#NV	#NV	#NV	#NV	#NV	#NV	#NV	#NV	5000.0
32	Francisco Canyon	-7.1	147.1	7.1	tropical	active margin	convergent	insular	semi-enclosed and enclosed sea	S Pacific Ocean	shelf-incising	0.1	2300.0	40.0	#NV	#NV	#NV	#NV	#NV	#NV	#NV	#NV	#NV	#NV	3.0	#NV	#NV	#NV	#NV	#NV	#NV	#NV	#NV	#NV	5000.0
32	Markham Canyon	-6.8	147.0	6.8	tropical	active margin	convergent	insular	semi-enclosed and enclosed sea	S Pacific Ocean	shelf-incising	0.1	6200.0	235.0	#NV	#NV	#NV	#NV	#NV	#NV	#NV	#NV	1.7	#NV	1.4	320.0	15.0	13.0	1000.0	#NV	#NV	#NV	#NV	#NV	5000.0
33	Esmeraldas Canyon	1.0	-79.6	1.0	tropical	active margin	convergent	continental	open sea	N Pacific Ocean	shelf-incising	#NV	#NV	130.0	#NV	#NV	#NV	#NV	#NV	#NV	#NV	#NV	#NV	#NV	1.6	300.0	37.0	21.0	5300.0	13.9	0.5	110.0	#NV	#NV	2700.0
34	Mira Canyon	1.8	-79.0	1.8	tropical	active margin	convergent	continental	open sea	N Pacific Ocean	shelf-incising	#NV	3600.0	137.0	#NV	#NV	#NV	#NV	#NV	#NV	#NV	1.4	#NV	#NV	16.3	687.0	67.0	33.2	3000.0	#NV	#NV	200.0	#NV	2.5	3500.0
34	Patia Canyon	2.6	-78.8	2.6	tropical	active margin	convergent	continental	open sea	N Pacific Ocean	#NV	#NV	#NV	54.2	4.0	#NV	#NV	#NV	13.5	#NV	#NV	1.3	#NV	#NV	32.7	687.0	67.0	33.2	3000.0	#NV	#NV	200.0	#NV	2.5	3500.0
35	Ipala Canyon	20.1	-105.6	20.1	tropical	active margin	convergent	continental	open sea	N Pacific Ocean	shelf-incising	0.1	4800.0	114.4	8.7	#NV	600.0	400.0	13.1	14.5	190.6	1.4	#NV	#NV	0.0	#NV	#NV	#NV	#NV	11.0	1.0	#NV	#NV	#NV	#NV
36	La Jolla Canyon	32.9	-117.3	32.9	temperate	active margin	transform	continental	open sea	N Pacific Ocean	shelf-incising	8.0	952.0	14.0	1.5	#NV	110.0	#NV	9.3	13.6	127.3	#NV	#NV	#NV	0.5	160.0	0.2	3.3	2200.0	4.1	#NV	#NV	#NV	#NV	#NV
36	Scripps Canyon	32.9	-117.3	32.9	temperate	active margin	transform	continental	open sea	N Pacific Ocean	shelf-incising	8.0	246.0	2.5	0.2	#NV	#NV	#NV	16.9	#NV	#NV	1.1	#NV	#NV	0.6	#NV	#NV	#NV	#NV	2.9	#NV	#NV	#NV	#NV	#NV
36	Sur Canyon	36.3	-121.9	36.3	temperate	active margin	transform	continental	open sea	N Pacific Ocean	shelf-incising	#NV	#NV	82.7	3.1	#NV	#NV	#NV	27.1	#NV	#NV	1.4	#NV	#NV	4.8	#NV	#NV	#NV	#NV	6.1	#NV	#NV	#NV	#NV	3000.0
36	Carmel Canyon	36.5	-121.9	36.5	temperate	active margin	transform	continental	open sea	N Pacific Ocean	shelf-incising	#NV	2012.0	23.2	#NV	#NV	#NV	#NV	#NV	#NV	#NV	1.1	#NV	#NV	0.2	#NV	#NV	0.7	#NV	4.8	#NV	#NV	#NV	#NV	#NV
36	Noyo Canyon	39.6	-124.0	39.6	temperate	active margin	transform	continental	open sea	N Pacific Ocean	shelf-incising	150.0	3000.0	63.9	7.8	#NV	#NV	#NV	8.2	#NV	#NV	1.1	#NV	#NV	11.8	#NV	#NV	#NV	#NV	11.2	#NV	#NV	#NV	#NV	3000.0
36	Eel Canyon	40.6	-124.5	40.6	temperate	active margin	complex	continental	open sea	N Pacific Ocean	shelf-incising	60.0	#NV	65.0	5.6	#NV	#NV	#NV	11.6	#NV	#NV	1.3	#NV	#NV	10.4	320.0	7.7	9.5	2300.0	10.0	0.5	80.0	#NV	#NV	2400.0
37	Redondo Canyon	33.8	-118.4	33.8	temperate	active margin	transform	continental	open sea	N Pacific Ocean	shelf-incising	20.0	700.0	20.5	2.4	#NV	390.0	#NV	8.5	6.2	52.6	1.2	1.3	21.0	1.7	#NV	#NV	#NV	#NV	17.0	#NV	#NV	#NV	#NV	#NV
37	Santa Monica Canyon	33.9	-118.5	33.9	temperate	active margin	transform	continental	open sea	N Pacific Ocean	shelf-incising	60.0	814.0	28.3	2.0	#NV	150.0	#NV	14.2	13.3	188.9	1.3	1.5	#NV	8.8	#NV	#NV	#NV	#NV	11.9	#NV	#NV	#NV	#NV	#NV
37	Dume Canyon	34.0	-118.8	34.0	temperate	active margin	transform	continental	open sea	N Pacific Ocean	shelf-incising	#NV	#NV	6.2	1.6	#NV	#NV	#NV	3.9	#NV	#NV	1.2	#NV	22.0	1.4	12.0	#NV	#NV	600.0	2.5	#NV	#NV	#NV	#NV	#NV
38	Mugu Canyon	34.1	-119.1	34.1	temperate	active margin	transform	continental	open sea	N Pacific Ocean	shelf-incising	10.0	#NV	15.4	#NV	#NV	#NV	#NV	#NV	#NV	#NV	1.2	#NV	#NV	1.9	4.6	0.1	0.8	1200.0	5.4	#NV	#NV	#NV	#NV	#NV
38	Hueneme Canyon	34.1	-119.2	34.1	temperate	active margin	transform	continental	open sea	N Pacific Ocean	shelf-incising	10.0	750.0	23.0	#NV	#NV	#NV	#NV	#NV	#NV	#NV	1.1	#NV	30.0	1.0	130.0	0.2	4.1	2000.0	7.5	0.5	60.0	#NV	#NV	#NV
39	Monterey Canyon	36.8	-121.8	36.8	temperate	active margin	transform	continental	open sea	N Pacific Ocean	shelf-incising	91.0	4000.0	229.7	12.0	#NV	1700.0	#NV	19.1	7.1	135.1	1.5	1.4	#NV	1.3	645.0	5.6	15.1	3000.0	26.1	#NV	#NV	#NV	#NV	#NV
39	Soquel Canyon	36.9	-122.0	36.9	temperate	active margin	transform	continental	open sea	N Pacific Ocean	shelf-incising	120.0	1000.0	9.0	0.8	#NV	#NV	#NV	12.0	#NV	#NV	#NV	#NV	30.0	9.8	315.0	5.2	1.0	3000.0	26.1	#NV	#NV	#NV	#NV	#NV
39	A�o Nuevo Canyon	37.0	-122.3	37.0	#NV	active margin	transform	continental	#NV	#NV	shelf-incising	#NV	#NV	25.1	4.5	#NV	#NV	#NV	5.6	#NV	#NV	1.1	#NV	#NV	13.2	#NV	#NV	#NV	#NV	13.6	#NV	#NV	#NV	#NV	#NV
39	Cabrillo Canyon	36.9	-122.2	36.9	#NV	active margin	transform	continental	#NV	#NV	shelf-incising	#NV	#NV	32.4	6.0	#NV	#NV	#NV	5.4	#NV	#NV	1.1	#NV	#NV	11.8	#NV	#NV	#NV	#NV	11.8	#NV	#NV	#NV	#NV	#NV
40	Astoria Canyon	46.3	-124.3	46.3	temperate	active margin	convergent	continental	open sea	N Pacific Ocean	shelf-incising	120.0	2085.0	110.0	#NV	#NV	450.0	#NV	#NV	#NV	244.4	#NV	#NV	45.0	16.7	#NV	#NV	#NV	#NV	41.2	0.2	165.0	63.0	2.0	2013.0
41	Quinault Canyon	47.4	-124.8	47.4	temperate	active margin	convergent	continental	open sea	N Pacific Ocean	shelf-incising	200.0	1800.0	#NV	30.0	#NV	#NV	#NV	#NV	#NV	#NV	#NV	1.9	#NV	36.3	#NV	#NV	#NV	#NV	35.3	#NV	#NV	#NV	#NV	#NV
42	Juan de Fuca Canyon	48.3	-124.1	48.3	temperate	active margin	convergent	continental	open sea	N Pacific Ocean	shelf-incising	#NV	#NV	#NV	#NV	#NV	#NV	#NV	#NV	#NV	#NV	#NV	#NV	#NV	10.6	#NV	#NV	#NV	#NV	79.5	#NV	#NV	#NV	#NV	#NV
43	Barkley Canyon	48.4	-126.0	48.4	temperate	active margin	convergent	continental	open sea	N Pacific Ocean	shelf-incising	#NV	#NV	6.0	13.0	#NV	#NV	#NV	0.5	#NV	#NV	#NV	#NV	#NV	100.0	#NV	#NV	#NV	#NV	62.5	0.2	200.0	#NV	#NV	#NV
44	Haida Gwaii 1	52.9	133.0	52.9	temperate	active margin	complex	insular	open sea	N Pacific Ocean	slope-confined	#NV	1281.0	8.0	#NV	#NV	#NV	#NV	#NV	#NV	#NV	1.0	9.8	#NV	#NV	#NV	#NV	#NV	#NV	12.0	0.9	180.0	#NV	#NV	3500.0
44	Haida Gwaii 2	52.9	133.0	52.9	temperate	active margin	complex	insular	open sea	N Pacific Ocean	slope-confined	#NV	1447.0	5.0	#NV	#NV	#NV	#NV	#NV	#NV	#NV	1.0	12.5	#NV	#NV	#NV	#NV	#NV	#NV	12.0	0.9	180.0	#NV	#NV	3500.0
44	Haida Gwaii 3	52.9	133.0	52.9	temperate	active margin	complex	insular	open sea	N Pacific Ocean	slope-confined	#NV	1451.0	4.7	#NV	#NV	#NV	#NV	#NV	#NV	#NV	1.0	13.6	#NV	#NV	#NV	#NV	#NV	#NV	12.0	0.9	180.0	#NV	#NV	3500.0
44	Haida Gwaii 4	52.9	133.0	52.9	temperate	active margin	complex	insular	open sea	N Pacific Ocean	slope-confined	#NV	1447.0	3.9	#NV	#NV	#NV	#NV	#NV	#NV	#NV	1.0	13.6	#NV	#NV	#NV	#NV	#NV	#NV	12.0	0.9	180.0	#NV	#NV	3500.0
44	Haida Gwaii 5	52.9	133.0	52.9	temperate	active margin	complex	insular	open sea	N Pacific Ocean	slope-confined	#NV	1446.0	6.4	#NV	#NV	#NV	#NV	#NV	#NV	#NV	1.0	12.3	#NV	#NV	#NV	#NV	#NV	#NV	12.0	0.9	180.0	#NV	#NV	3500.0
44	Haida Gwaii 6	52.9	133.0	52.9	temperate	active margin	complex	insular	open sea	N Pacific Ocean	shelf-incising	180.0	1122.0	7.0	#NV	#NV	#NV	#NV	#NV	#NV	#NV	#NV	7.5	#NV	#NV	#NV	#NV	#NV	#NV	#NV	#NV	180.0	#NV	#NV	3500.0
45	Tarr Canyon	59.5	-145.8	59.5	temperate	active margin	convergent	#NV	open sea	N Pacific Ocean	slope-confined	#NV	4400.0	48.0	5.0	#NV	#NV	#NV	9.6	#NV	#NV	#NV	4.6	#NV	92.6	#NV	#NV	#NV	#NV	101.0	0.1	200.0	47.3	5.3	4400.0
46	North Palawan Canyon	11.9	119.3	11.9	tropical	active margin	convergent	#NV	semi-enclosed and enclosed sea	N Pacific Ocean	shelf-incising	140.0	3350.0	178.0	5.4	#NV	300.0	#NV	33.0	18.0	593.3	1.2	1.2	13.3	#NV	#NV	#NV	#NV	#NV	65.0	0.3	290.0	205.0	1.0	#NV
47	Modern Central Canyon	17.7	111.8	17.7	tropical	active margin	convergent	#NV	semi-enclosed and enclosed sea	N Pacific Ocean	slope-confined	2400.0	3000.0	200.0	30.0	#NV	#NV	#NV	6.7	#NV	#NV	#NV	#NV	#NV	#NV	#NV	#NV	#NV	#NV	345.0	#NV	#NV	#NV	#NV	3050.0
48	C1 Canyon	19.0	113.0	19.0	tropical	active margin	convergent	#NV	semi-enclosed and enclosed sea	N Pacific Ocean	slope-confined	477.0	900.0	25.0	5.0	#NV	175.0	#NV	5.0	28.6	142.9	#NV	#NV	10.2	290.0	#NV	#NV	#NV	#NV	#NV	#NV	#NV	#NV	0.7	#NV
48	C2 Canyon	19.0	113.0	19.0	tropical	active margin	convergent	#NV	semi-enclosed and enclosed sea	N Pacific Ocean	slope-confined	470.0	900.0	24.0	7.0	#NV	175.0	#NV	3.4	40.0	137.1	#NV	#NV	12.2	290.0	#NV	#NV	#NV	#NV	#NV	#NV	#NV	#NV	0.7	#NV
48	C3 Canyon	19.0	113.0	19.0	tropical	active margin	convergent	#NV	semi-enclosed and enclosed sea	N Pacific Ocean	slope-confined	671.0	1500.0	21.0	3.0	#NV	100.0	#NV	7.0	30.0	210.0	#NV	#NV	8.7	290.0	#NV	#NV	#NV	#NV	#NV	#NV	#NV	#NV	0.7	#NV
48	C4 Gully	19.0	113.0	19.0	tropical	active margin	convergent	#NV	semi-enclosed and enclosed sea	N Pacific Ocean	slope-confined	792.0	#NV	8.0	2.0	#NV	60.0	#NV	4.0	33.3	133.3	#NV	#NV	6.1	290.0	#NV	#NV	#NV	#NV	#NV	#NV	#NV	#NV	0.7	#NV
48	C5 Gully	19.0	113.0	19.0	tropical	active margin	convergent	#NV	semi-enclosed and enclosed sea	N Pacific Ocean	slope-confined	500.0	#NV	8.9	2.0	#NV	40.0	#NV	4.5	50.0	222.5	#NV	#NV	5.4	290.0	#NV	#NV	#NV	#NV	#NV	#NV	#NV	#NV	0.7	#NV
48	C6 Gully	19.0	113.0	19.0	tropical	active margin	convergent	#NV	semi-enclosed and enclosed sea	N Pacific Ocean	slope-confined	500.0	600.0	11.0	3.7	#NV	80.0	#NV	3.0	46.3	137.5	#NV	#NV	5.6	290.0	#NV	#NV	#NV	#NV	#NV	#NV	#NV	#NV	0.7	#NV
48	C7 Gully	19.0	113.0	19.0	tropical	active margin	convergent	#NV	semi-enclosed and enclosed sea	N Pacific Ocean	slope-confined	540.0	700.0	9.5	1.2	#NV	35.0	#NV	7.9	34.3	271.4	#NV	#NV	5.5	290.0	#NV	#NV	#NV	#NV	#NV	#NV	#NV	#NV	0.7	#NV
49	C1 Canyon	19.9	114.8	19.9	tropical	active margin	convergent	continental	semi-enclosed and enclosed sea	N Pacific Ocean	slope-confined	520.0	1360.0	21.0	3.7	2.7	#NV	142.0	5.7	#NV	#NV	1.0	#NV	#NV	260.0	#NV	#NV	#NV	#NV	260.0	#NV	#NV	#NV	#NV	#NV
49	C2 Canyon	19.9	114.8	19.9	tropical	active margin	convergent	continental	semi-enclosed and enclosed sea	N Pacific Ocean	slope-confined	680.0	1160.0	23.0	3.8	3.1	#NV	220.0	6.0	#NV	#NV	1.0	#NV	#NV	260.0	#NV	#NV	#NV	#NV	260.0	#NV	#NV	#NV	#NV	#NV
49	C3 Canyon	19.9	114.8	19.9	tropical	active margin	convergent	continental	semi-enclosed and enclosed sea	N Pacific Ocean	slope-confined	620.0	1220.0	22.7	4.8	3.5	#NV	242.0	4.7	#NV	#NV	1.0	#NV	#NV	260.0	#NV	#NV	#NV	#NV	260.0	#NV	#NV	#NV	#NV	#NV
49	C4 Canyon	19.9	114.8	19.9	tropical	active margin	convergent	continental	semi-enclosed and enclosed sea	N Pacific Ocean	slope-confined	860.0	1340.0	21.9	3.5	2.4	#NV	241.0	6.2	#NV	#NV	1.0	#NV	#NV	260.0	#NV	#NV	#NV	#NV	260.0	#NV	#NV	#NV	#NV	#NV
49	C5 Canyon	19.9	114.8	19.9	tropical	active margin	convergent	continental	semi-enclosed and enclosed sea	N Pacific Ocean	slope-confined	620.0	1540.0	25.8	3.8	2.6	#NV	246.0	6.7	#NV	#NV	1.0	#NV	#NV	260.0	#NV	#NV	#NV	#NV	260.0	#NV	#NV	#NV	#NV	#NV
49	C6 Canyon	19.9	114.8	19.9	tropical	active margin	convergent	continental	semi-enclosed and enclosed sea	N Pacific Ocean	slope-confined	730.0	1550.0	30.2	4.1	3.3	#NV	289.0	7.4	#NV	#NV	1.0	#NV	#NV	260.0	#NV	#NV	#NV	#NV	260.0	#NV	#NV	#NV	#NV	#NV
49	C7 Canyon	19.9	114.8	19.9	tropical	active margin	convergent	continental	semi-enclosed and enclosed sea	N Pacific Ocean	slope-confined	1060.0	1580.0	21.8	3.5	2.4	#NV	176.0	6.2	#NV	#NV	1.0	#NV	#NV	260.0	#NV	#NV	#NV	#NV	260.0	#NV	#NV	#NV	#NV	#NV
49	C8 Canyon	19.9	114.8	19.9	tropical	active margin	convergent	continental	semi-enclosed and enclosed sea	N Pacific Ocean	slope-confined	840.0	1400.0	28.0	4.0	3.0	#NV	222.0	7.0	#NV	#NV	1.0	#NV	#NV	260.0	#NV	#NV	#NV	#NV	260.0	#NV	#NV	#NV	#NV	#NV
49	C9 Canyon	19.9	114.8	19.9	tropical	active margin	convergent	continental	semi-enclosed and enclosed sea	N Pacific Ocean	slope-confined	850.0	1500.0	30.5	4.6	2.9	#NV	246.0	6.7	#NV	#NV	1.0	#NV	#NV	260.0	#NV	#NV	#NV	#NV	260.0	#NV	#NV	#NV	#NV	#NV
49	C10 Canyon	19.9	114.8	19.9	tropical	active margin	convergent	continental	semi-enclosed and enclosed sea	N Pacific Ocean	slope-confined	1000.0	1430.0	19.0	4.2	2.6	#NV	209.0	4.5	#NV	#NV	1.0	#NV	#NV	260.0	#NV	#NV	#NV	#NV	260.0	#NV	#NV	#NV	#NV	#NV
49	C11 Canyon	19.9	114.8	19.9	tropical	active margin	convergent	continental	semi-enclosed and enclosed sea	N Pacific Ocean	slope-confined	770.0	1410.0	25.3	3.7	2.2	#NV	171.0	6.8	#NV	#NV	1.0	#NV	#NV	260.0	#NV	#NV	#NV	#NV	260.0	#NV	#NV	#NV	#NV	#NV
49	C12 Canyon	19.9	114.8	19.9	tropical	active margin	convergent	continental	semi-enclosed and enclosed sea	N Pacific Ocean	slope-confined	910.0	1260.0	22.5	4.5	3.0	#NV	166.0	4.9	#NV	#NV	1.2	#NV	#NV	260.0	#NV	#NV	#NV	#NV	260.0	#NV	#NV	#NV	#NV	#NV
49	C13 Canyon	19.9	114.8	19.9	tropical	active margin	convergent	continental	semi-enclosed and enclosed sea	N Pacific Ocean	slope-confined	790.0	1350.0	23.4	4.2	2.9	#NV	157.0	5.6	#NV	#NV	1.0	#NV	#NV	260.0	#NV	#NV	#NV	#NV	260.0	#NV	#NV	#NV	#NV	#NV
49	C14 Canyon	19.9	114.8	19.9	tropical	active margin	convergent	continental	semi-enclosed and enclosed sea	N Pacific Ocean	slope-confined	890.0	1320.0	22.5	1.8	1.6	#NV	155.0	12.6	#NV	#NV	1.0	#NV	#NV	260.0	#NV	#NV	#NV	#NV	260.0	#NV	#NV	#NV	#NV	#NV
49	C15 Canyon	19.9	114.8	19.9	tropical	active margin	convergent	continental	semi-enclosed and enclosed sea	N Pacific Ocean	slope-confined	860.0	1240.0	19.3	2.9	2.2	#NV	158.0	6.6	#NV	#NV	1.0	#NV	#NV	260.0	#NV	#NV	#NV	#NV	260.0	#NV	#NV	#NV	#NV	#NV
49	C16 Canyon	19.9	114.8	19.9	tropical	active margin	convergent	continental	semi-enclosed and enclosed sea	N Pacific Ocean	slope-confined	940.0	1320.0	19.9	2.6	2.1	#NV	200.0	7.5	#NV	#NV	1.0	#NV	#NV	260.0	#NV	#NV	#NV	#NV	260.0	#NV	#NV	#NV	#NV	#NV
49	C17Canyon	19.9	114.8	19.9	tropical	active margin	convergent	continental	semi-enclosed and enclosed sea	N Pacific Ocean	slope-confined	810.0	1350.0	17.9	2.0	1.4	#NV	200.0	9.0	#NV	#NV	1.0	#NV	#NV	260.0	#NV	#NV	#NV	#NV	260.0	#NV	#NV	#NV	#NV	#NV
50	Zhujiang/Pearl River Canyon	20.0	114.3	20.0	tropical	active margin	complex	continental	semi-enclosed and enclosed sea	N Pacific Ocean	shelf-incising	200.0	3600.0	213.5	#NV	#NV	#NV	#NV	#NV	#NV	#NV	1.1	0.6	#NV	442.8	2200.0	260.0	490.0	2000.0	260.0	#NV	#NV	#NV	#NV	#NV
51	Dongsha Canyon	21.7	117.9	21.7	tropical	active margin	complex	continental	semi-enclosed and enclosed sea	N Pacific Ocean	slope-confined	#NV	3000.0	190.0	#NV	10.0	#NV	#NV	#NV	#NV	#NV	#NV	#NV	#NV	146.9	#NV	#NV	#NV	#NV	147.9	#NV	#NV	#NV	3.0	#NV
52	Taiwan Canyon	22.0	118.3	22.0	tropical	active margin	complex	continental	semi-enclosed and enclosed sea	N Pacific Ocean	shelf-incising	200.0	3500.0	150.0	#NV	#NV	#NV	#NV	#NV	#NV	#NV	#NV	1.4	#NV	182.8	#NV	#NV	#NV	#NV	195.9	#NV	#NV	#NV	#NV	#NV
53	Hongtsai Canyon	22.1	120.5	22.1	tropical	active margin	complex	insular	semi-enclosed and enclosed sea	N Pacific Ocean	slope-confined	130.0	600.0	30.0	6.0	#NV	310.0	#NV	5.0	19.4	96.8	#NV	0.8	#NV	15.3	#NV	#NV	#NV	#NV	10.0	0.5	80.0	#NV	#NV	3000.0
54	Fangliao Canyon	22.3	120.6	22.3	tropical	active margin	complex	insular	semi-enclosed and enclosed sea	N Pacific Ocean	shelf-incising	35.0	1200.0	52.6	10.0	#NV	#NV	#NV	5.3	#NV	#NV	#NV	1.1	#NV	8.3	#NV	#NV	#NV	#NV	10.0	0.5	80.0	#NV	#NV	3000.0
55	Kaoping Canyon	22.5	120.4	22.5	tropical	active margin	complex	insular	semi-enclosed and enclosed sea	N Pacific Ocean	shelf-incising	186.0	3670.0	279.7	10.0	#NV	600.0	#NV	28.0	16.7	466.1	1.7	1.3	#NV	0.5	170.0	8.5	3.3	4000.0	10.0	0.5	80.0	#NV	#NV	3000.0
56	Kaohsiung Canyon	22.5	120.2	22.5	tropical	active margin	complex	insular	semi-enclosed and enclosed sea	N Pacific Ocean	shelf-incising	150.0	700.0	#NV	4.3	#NV	#NV	#NV	#NV	#NV	#NV	#NV	1.6	28.5	11.7	#NV	#NV	#NV	#NV	10.0	0.5	80.0	#NV	#NV	3000.0
57	Penghu Canyon	22.7	119.9	22.7	tropical	active margin	complex	#NV	semi-enclosed and enclosed sea	N Pacific Ocean	shelf-incising	200.0	3500.0	180.0	10.0	#NV	#NV	#NV	18.0	#NV	#NV	#NV	1.0	#NV	39.8	#NV	#NV	#NV	#NV	#NV	#NV	#NV	#NV	#NV	5450.0
58	Taitung Canyon	22.4	121.4	22.4	tropical	active margin	complex	insular	open sea	N Pacific Ocean	shelf-incising	#NV	#NV	170.0	14.0	#NV	500.0	#NV	12.1	28.0	340.0	1.3	#NV	#NV	25.1	84.0	3.7	1.6	3700.0	3.8	#NV	#NV	#NV	#NV	#NV
59	Hualien Canyon	24.0	121.7	24.0	temperate	active margin	complex	insular	open sea	N Pacific Ocean	shelf-incising	#NV	6100.0	205.0	#NV	#NV	#NV	#NV	#NV	#NV	#NV	1.3	#NV	#NV	30.1	138.0	8.0	3.3	2400.0	3.2	#NV	#NV	#NV	#NV	5450.0
60	Goto Canyon	32.4	128.6	32.4	temperate	active margin	convergent	continental	open sea	N Pacific Ocean	#NV	300.0	#NV	50.0	10.0	#NV	#NV	#NV	5.0	#NV	#NV	#NV	#NV	#NV	#NV	5500.0	15.0	750.0	3100.0	#NV	#NV	200.0	#NV	#NV	#NV
61	Aoga Shima Canyon	32.6	139.9	32.6	temperate	active margin	convergent	insular	open sea	N Pacific Ocean	#NV	#NV	#NV	#NV	#NV	#NV	#NV	#NV	#NV	#NV	#NV	#NV	1.6	#NV	236.1	#NV	#NV	#NV	#NV	#NV	#NV	#NV	#NV	#NV	#NV
62	Tenryu Canyon	34.4	137.8	34.4	temperate	active margin	convergent	insular	open sea	N Pacific Ocean	slope-confined	800.0	3800.0	130.0	5.6	#NV	#NV	#NV	23.2	#NV	#NV	#NV	#NV	#NV	25.9	210.0	6.0	5.1	2000.0	7.8	#NV	#NV	#NV	#NV	#NV
63	Boso Canyon	34.8	140.1	34.8	temperate	active margin	complex	insular	open sea	N Pacific Ocean	slope-confined	2100.0	6400.0	100.0	#NV	#NV	#NV	#NV	#NV	#NV	#NV	1.5	#NV	#NV	12.2	#NV	#NV	#NV	#NV	#NV	#NV	#NV	#NV	#NV	#NV
64	Kushiro Canyon	42.9	144.3	42.9	temperate	active margin	convergent	insular	open sea	N Pacific Ocean	shelf-incising	70.0	7000.0	233.0	2.0	#NV	800.0	#NV	118.9	2.5	291.3	1.1	1.7	#NV	9.9	154.0	#NV	2.5	122.0	10.0	0.4	#NV	#NV	#NV	7000.0
65	Avachinsky Canyon	52.8	158.8	52.8	temperate	active margin	complex	continental	open sea	N Pacific Ocean	shelf-incising	130.0	3520.0	#NV	#NV	#NV	1000.0	#NV	#NV	#NV	#NV	#NV	1.8	#NV	8.6	122.0	#NV	5.1	#NV	32.7	0.3	150.0	#NV	#NV	7000.0
65	Zhupanovsky Canyon	53.5	160.3	53.5	temperate	active margin	convergent	continental	open sea	N Pacific Ocean	shelf-incising	93.0	6730.0	156.0	#NV	#NV	#NV	#NV	#NV	#NV	#NV	#NV	2.4	#NV	11.3	#NV	#NV	#NV	#NV	26.0	0.3	150.0	#NV	#NV	7000.0
65	Kronotsky Canyon	54.0	160.5	54.0	temperate	active margin	convergent	continental	open sea	N Pacific Ocean	shelf-incising	96.0	3000.0	105.0	#NV	#NV	2000.0	#NV	#NV	#NV	52.5	#NV	2.2	20.0	16.6	#NV	#NV	#NV	#NV	22.0	0.4	150.0	#NV	#NV	7000.0
65	Olga Canyon	54.2	161.0	54.2	temperate	active margin	convergent	continental	open sea	N Pacific Ocean	shelf-incising	96.0	3600.0	66.0	#NV	#NV	1000.0	#NV	#NV	#NV	66.0	#NV	3.0	25.0	18.5	#NV	#NV	#NV	#NV	34.4	0.2	150.0	#NV	#NV	7000.0
65	Tyushevsky Canyon	54.4	161.4	54.4	temperate	active margin	convergent	continental	open sea	N Pacific Ocean	shelf-incising	110.0	3300.0	45.0	#NV	#NV	#NV	#NV	#NV	#NV	#NV	#NV	4.2	#NV	13.9	#NV	#NV	#NV	#NV	16.4	0.5	150.0	#NV	#NV	7000.0
65	Storozh Canyon	55.4	162.0	55.4	temperate	active margin	convergent	continental	open sea	N Pacific Ocean	shelf-incising	110.0	4000.0	#NV	#NV	#NV	#NV	#NV	#NV	#NV	#NV	#NV	5.1	#NV	16.6	#NV	#NV	#NV	#NV	12.1	0.7	150.0	#NV	#NV	7000.0
65	Kamchatsky Canyon	56.2	162.6	56.2	temperate	active margin	convergent	continental	open sea	N Pacific Ocean	shelf-incising	100.0	5660.0	175.0	#NV	#NV	1700.0	#NV	#NV	#NV	102.9	#NV	1.8	20.0	3.9	760.0	33.0	56.0	1200.0	18.4	0.5	150.0	#NV	#NV	7000.0
66	Bering Canyon	53.8	-167.8	53.8	temperate	active margin	convergent	#NV	semi-enclosed and enclosed sea	N Pacific Ocean	shelf-incising	#NV	3200.0	411.0	#NV	#NV	#NV	#NV	#NV	#NV	#NV	#NV	0.4	#NV	#NV	#NV	#NV	#NV	#NV	704.6	0.0	162.5	40.0	5.0	3000.0
67	Zhemchug Canyon	58.4	-174.5	58.4	temperate	active margin	convergent	#NV	semi-enclosed and enclosed sea	N Pacific Ocean	shelf-incising	120.0	3200.0	168.0	#NV	#NV	#NV	#NV	#NV	#NV	#NV	#NV	0.8	#NV	630.3	#NV	#NV	#NV	#NV	677.7	0.0	150.0	40.0	5.0	3000.0
67	Pervenets Canyon	59.5	-178.5	59.5	temperate	active margin	convergent	#NV	semi-enclosed and enclosed sea	N Pacific Ocean	shelf-incising	140.0	3200.0	188.0	#NV	#NV	#NV	#NV	#NV	#NV	#NV	#NV	1.3	#NV	353.0	#NV	#NV	#NV	#NV	1447.8	0.0	162.5	40.0	5.0	3000.0
67	Navarinsky Canyon	60.4	-179.9	60.4	temperate	active margin	convergent	#NV	semi-enclosed and enclosed sea	N Pacific Ocean	shelf-incising	150.0	3200.0	258.0	#NV	#NV	#NV	#NV	#NV	#NV	#NV	#NV	0.5	#NV	207.4	#NV	#NV	#NV	#NV	1136.4	0.0	162.5	40.0	5.0	3000.0
68	Middle Canyon (west)	58.4	-176.4	58.4	temperate	active margin	convergent	#NV	semi-enclosed and enclosed sea	N Pacific Ocean	slope-confined	130.0	3200.0	40.0	#NV	#NV	#NV	#NV	#NV	#NV	#NV	#NV	4.1	#NV	612.2	#NV	#NV	#NV	#NV	1426.1	0.0	162.5	40.0	5.0	3000.0
68	Middle Canyon (east)	58.4	-176.4	58.4	temperate	active margin	convergent	#NV	semi-enclosed and enclosed sea	N Pacific Ocean	slope-confined	130.0	3200.0	60.0	#NV	#NV	#NV	#NV	#NV	#NV	#NV	#NV	2.9	#NV	626.0	#NV	#NV	#NV	#NV	1426.1	0.0	162.5	40.0	5.0	3000.0
69	St. Matthew Canyon (west)	58.5	-177.5	58.5	temperate	active margin	convergent	#NV	semi-enclosed and enclosed sea	N Pacific Ocean	slope-confined	145.0	3200.0	70.0	#NV	#NV	#NV	#NV	#NV	#NV	#NV	#NV	2.5	#NV	595.4	#NV	#NV	#NV	#NV	1424.3	0.0	162.5	40.0	5.0	3000.0
69	St. Matthew Canyon (east)	58.5	-177.5	58.5	temperate	active margin	convergent	#NV	semi-enclosed and enclosed sea	N Pacific Ocean	slope-confined	145.0	3200.0	34.0	#NV	#NV	1100.0	#NV	#NV	#NV	30.9	#NV	5.1	#NV	582.4	#NV	#NV	#NV	#NV	1424.3	0.0	162.5	40.0	5.0	3000.0
70	Hay Canyon	-35.8	117.7	35.8	temperate	passive margin	#NV	continental	open sea	Indian Ocean	#NV	#NV	#NV	60.0	#NV	#NV	#NV	#NV	#NV	#NV	#NV	#NV	#NV	#NV	38.9	#NV	#NV	#NV	#NV	35.1	0.2	100.0	#NV	#NV	3200.0
70	Albany Canyon	-35.7	118.1	35.7	temperate	passive margin	#NV	continental	open sea	Indian Ocean	shelf-incising	#NV	#NV	55.0	#NV	#NV	#NV	#NV	#NV	#NV	#NV	#NV	#NV	#NV	39.0	#NV	#NV	#NV	#NV	40.4	0.1	100.0	#NV	#NV	3200.0
70	Vancouver Canyon	-35.6	118.5	35.6	temperate	passive margin	#NV	continental	open sea	Indian Ocean	shelf-incising	#NV	#NV	60.0	#NV	#NV	#NV	#NV	#NV	#NV	#NV	#NV	#NV	#NV	44.2	#NV	#NV	#NV	#NV	38.7	0.2	100.0	#NV	#NV	3200.0
70	Wilson Canyon	-35.5	116.6	35.5	temperate	passive margin	#NV	continental	open sea	Indian Ocean	#NV	#NV	#NV	65.0	#NV	#NV	#NV	#NV	#NV	#NV	#NV	#NV	#NV	#NV	36.0	#NV	#NV	#NV	#NV	33.8	0.2	100.0	#NV	#NV	3200.0
70	Denmark Canyon	-35.4	117.4	35.4	temperate	passive margin	#NV	continental	open sea	Indian Ocean	#NV	#NV	#NV	55.0	#NV	#NV	#NV	#NV	#NV	#NV	#NV	#NV	#NV	#NV	44.9	#NV	#NV	#NV	#NV	35.1	0.2	100.0	#NV	#NV	3200.0
70	Wilyunup Canyon	-35.4	119.0	35.4	temperate	passive margin	#NV	continental	open sea	Indian Ocean	#NV	#NV	#NV	60.0	#NV	#NV	#NV	#NV	#NV	#NV	#NV	#NV	#NV	#NV	44.8	#NV	#NV	#NV	#NV	44.6	0.1	100.0	#NV	#NV	3200.0
70	Broke Canyon	-35.0	116.5	35.0	temperate	passive margin	#NV	continental	open sea	Indian Ocean	#NV	#NV	#NV	55.0	#NV	#NV	#NV	#NV	#NV	#NV	#NV	#NV	#NV	#NV	#NV	#NV	#NV	#NV	#NV	#NV	#NV	100.0	#NV	#NV	3200.0
70	Frankland Canyon	-35.0	116.5	35.0	temperate	passive margin	#NV	continental	open sea	Indian Ocean	#NV	#NV	#NV	50.0	#NV	#NV	#NV	#NV	#NV	#NV	#NV	#NV	#NV	#NV	#NV	#NV	#NV	#NV	#NV	#NV	#NV	100.0	#NV	#NV	3200.0
70	Esperance Canyon	-35.0	120.5	35.0	temperate	passive margin	#NV	continental	open sea	Indian Ocean	#NV	#NV	#NV	100.0	#NV	#NV	#NV	#NV	#NV	#NV	#NV	#NV	#NV	#NV	67.8	#NV	#NV	#NV	#NV	73.3	0.1	100.0	#NV	#NV	3200.0
70	Whale Canyon	-34.8	120.2	34.8	temperate	passive margin	#NV	continental	open sea	Indian Ocean	#NV	#NV	#NV	55.0	#NV	#NV	#NV	#NV	#NV	#NV	#NV	#NV	#NV	#NV	58.6	#NV	#NV	#NV	#NV	69.6	0.1	100.0	#NV	#NV	3200.0
70	Bremer Canyon	-34.7	120.0	34.7	temperate	passive margin	#NV	continental	open sea	Indian Ocean	#NV	#NV	#NV	90.0	#NV	#NV	#NV	#NV	#NV	#NV	#NV	#NV	#NV	#NV	33.8	#NV	#NV	#NV	#NV	65.6	0.1	100.0	#NV	#NV	3200.0
71	Tugela Canyon	-29.7	31.9	29.7	temperate	passive margin	#NV	continental	open sea	Indian Ocean	slope-confined	644.0	2828.0	120.0	#NV	#NV	#NV	#NV	#NV	#NV	#NV	#NV	#NV	#NV	52.0	400.0	4.6	29.0	3100.0	43.0	0.1	100.0	#NV	#NV	#NV
72	Saint-Etienne Canyon	-21.3	55.4	21.3	tropical	passive margin	#NV	insular	open sea	Indian Ocean	slope-confined	300.0	#NV	24.5	4.0	#NV	300.0	#NV	6.1	13.3	81.7	#NV	5.7	#NV	1.1	56.0	#NV	0.4	3000.0	1.5	#NV	120.0	#NV	#NV	4200.0
72	Pierrefonds Canyon	-21.3	55.4	21.3	tropical	passive margin	#NV	insular	open sea	Indian Ocean	#NV	#NV	#NV	21.1	4.0	#NV	#NV	#NV	5.3	#NV	#NV	#NV	#NV	#NV	1.3	56.0	#NV	0.4	3000.0	1.2	#NV	120.0	#NV	#NV	4200.0
73	Canyon 1	12.7	80.8	12.7	tropical	passive margin	#NV	continental	open sea	Indian Ocean	#NV	410.0	2862.0	10.0	#NV	1.1	#NV	260.0	#NV	#NV	#NV	1.2	#NV	#NV	46.0	350.0	2.0	18.0	500.0	38.5	#NV	#NV	#NV	#NV	#NV
73	Canyon 2	12.7	80.8	12.7	tropical	passive margin	#NV	continental	open sea	Indian Ocean	slope-confined	325.0	2836.0	12.3	#NV	1.5	#NV	410.0	#NV	#NV	#NV	1.1	#NV	#NV	46.0	350.0	2.0	18.0	500.0	38.5	#NV	#NV	#NV	#NV	#NV
73	Canyon 3	12.7	80.8	12.7	tropical	passive margin	#NV	continental	open sea	Indian Ocean	slope-confined	254.0	2842.0	10.6	#NV	1.9	#NV	423.0	#NV	#NV	#NV	1.0	#NV	#NV	46.0	350.0	2.0	18.0	500.0	38.5	#NV	#NV	#NV	#NV	#NV
73	Canyon 4	12.7	80.8	12.7	tropical	passive margin	#NV	continental	open sea	Indian Ocean	slope-confined	248.0	2767.0	11.8	#NV	1.4	#NV	265.0	#NV	#NV	#NV	1.1	#NV	#NV	46.0	350.0	2.0	18.0	500.0	38.5	#NV	#NV	#NV	#NV	#NV
73	Canyon 5	12.7	80.8	12.7	tropical	passive margin	#NV	continental	open sea	Indian Ocean	slope-confined	262.0	2953.0	11.8	#NV	1.7	#NV	398.0	#NV	#NV	#NV	1.1	#NV	#NV	46.0	350.0	2.0	18.0	500.0	38.5	#NV	#NV	#NV	#NV	#NV
73	Canyon 6	12.7	80.8	12.7	tropical	passive margin	#NV	continental	open sea	Indian Ocean	slope-confined	254.0	2922.0	11.9	#NV	2.1	#NV	538.0	#NV	#NV	#NV	1.0	#NV	#NV	46.0	350.0	2.0	18.0	500.0	38.5	#NV	#NV	#NV	#NV	#NV
73	Canyon 7	12.7	80.8	12.7	tropical	passive margin	#NV	continental	open sea	Indian Ocean	#NV	443.0	2781.0	12.5	#NV	1.8	#NV	346.0	#NV	#NV	#NV	1.2	#NV	#NV	46.0	350.0	2.0	18.0	500.0	38.5	#NV	#NV	#NV	#NV	#NV
73	Canyon 8	12.7	80.8	12.7	tropical	passive margin	#NV	continental	open sea	Indian Ocean	shelf-incising	244.0	2959.0	15.7	#NV	3.7	#NV	522.0	#NV	#NV	#NV	1.2	#NV	#NV	46.0	350.0	2.0	18.0	500.0	38.5	#NV	#NV	#NV	#NV	#NV
73	Canyon 9	12.7	80.8	12.7	tropical	passive margin	#NV	continental	open sea	Indian Ocean	shelf-incising	325.0	2883.0	22.7	#NV	3.9	#NV	576.0	#NV	#NV	#NV	1.2	#NV	#NV	38.0	350.0	2.0	18.0	500.0	38.5	#NV	#NV	#NV	#NV	#NV
73	Canyon 10	12.7	80.8	12.7	tropical	passive margin	#NV	continental	open sea	Indian Ocean	slope-confined	301.0	2437.0	10.3	#NV	2.5	#NV	594.0	#NV	#NV	#NV	1.1	#NV	#NV	38.0	350.0	2.0	18.0	500.0	38.5	#NV	#NV	#NV	#NV	#NV
73	Canyon 11	12.7	80.8	12.7	tropical	passive margin	#NV	continental	open sea	Indian Ocean	slope-confined	358.0	2928.0	14.3	#NV	2.6	#NV	489.0	#NV	#NV	#NV	1.1	#NV	#NV	38.0	350.0	2.0	18.0	500.0	38.5	#NV	#NV	#NV	#NV	#NV
73	Canyon 12	12.7	80.8	12.7	tropical	passive margin	#NV	continental	open sea	Indian Ocean	slope-confined	389.0	2385.0	5.5	#NV	1.1	#NV	240.0	#NV	#NV	#NV	1.0	#NV	#NV	38.0	350.0	2.0	18.0	500.0	38.5	#NV	#NV	#NV	#NV	#NV
73	Canyon 13	12.7	80.8	12.7	tropical	passive margin	#NV	continental	open sea	Indian Ocean	slope-confined	248.0	2389.0	5.7	#NV	1.1	#NV	305.0	#NV	#NV	#NV	1.0	#NV	#NV	34.0	350.0	2.0	18.0	500.0	38.5	#NV	#NV	#NV	#NV	#NV
73	Canyon 14	12.7	80.8	12.7	tropical	passive margin	#NV	continental	open sea	Indian Ocean	slope-confined	337.0	2534.0	4.4	#NV	1.6	#NV	372.0	#NV	#NV	#NV	1.0	#NV	#NV	34.0	350.0	2.0	18.0	500.0	38.5	#NV	#NV	#NV	#NV	#NV
73	Canyon 15	12.7	80.8	12.7	tropical	passive margin	#NV	continental	open sea	Indian Ocean	slope-confined	606.0	2309.0	4.1	#NV	1.7	#NV	283.0	#NV	#NV	#NV	1.0	#NV	#NV	34.0	350.0	2.0	18.0	500.0	38.5	#NV	#NV	#NV	#NV	#NV
73	Canyon 16	12.7	80.8	12.7	tropical	passive margin	#NV	continental	open sea	Indian Ocean	slope-confined	613.0	1669.0	3.7	#NV	0.6	#NV	100.0	#NV	#NV	#NV	1.0	#NV	#NV	34.0	350.0	2.0	18.0	500.0	38.5	#NV	#NV	#NV	#NV	#NV
73	Canyon 17	12.7	80.8	12.7	tropical	passive margin	#NV	continental	open sea	Indian Ocean	slope-confined	718.0	1975.0	4.1	#NV	1.0	#NV	170.0	#NV	#NV	#NV	1.0	#NV	#NV	34.0	350.0	2.0	18.0	500.0	38.5	#NV	#NV	#NV	#NV	#NV
73	Canyon 18	12.7	80.8	12.7	tropical	passive margin	#NV	continental	open sea	Indian Ocean	slope-confined	687.0	1712.0	4.9	#NV	0.9	#NV	133.0	#NV	#NV	#NV	1.0	#NV	#NV	26.0	350.0	2.0	18.0	500.0	38.5	#NV	#NV	#NV	#NV	#NV
73	Canyon 19	12.7	80.8	12.7	tropical	passive margin	#NV	continental	open sea	Indian Ocean	slope-confined	262.0	1455.0	6.8	#NV	1.3	#NV	147.0	#NV	#NV	#NV	1.0	#NV	#NV	26.0	350.0	2.0	18.0	500.0	38.5	#NV	#NV	#NV	#NV	#NV
73	Canyon 20	12.7	80.8	12.7	tropical	passive margin	#NV	continental	open sea	Indian Ocean	slope-confined	314.0	1384.0	8.3	#NV	1.4	#NV	205.0	#NV	#NV	#NV	1.0	#NV	#NV	26.0	350.0	2.0	18.0	500.0	38.5	#NV	#NV	#NV	#NV	#NV
74	Indus Canyon	23.7	67.5	23.7	temperate	passive margin	#NV	continental	open sea	Indian Ocean	shelf-incising	20.0	1500.0	120.0	17.0	#NV	1000.0	#NV	7.1	17.0	120.0	#NV	#NV	#NV	22.0	3200.0	5.0	980.0	7800.0	128.4	0.1	135.0	75.0	2.1	2750.0
75	Barrow Canyon	71.6	-155.9	71.6	polar	passive margin	#NV	continental	open sea	Arctic Ocean	shelf-incising	50.0	3800.0	150.0	#NV	#NV	#NV	#NV	#NV	#NV	#NV	#NV	#NV	#NV	14.0	#NV	#NV	#NV	#NV	#NV	#NV	400.0	#NV	#NV	3800.0
76	Opouawe Canyon	-41.9	175.2	41.9	temperate	active margin	complex	insular	semi-enclosed and enclosed sea	Cook Strait	shelf-incising	80.0	2600.0	58.1	13.7	#NV	640.0	#NV	4.2	21.4	90.8	#NV	2.1	#NV	3.6	#NV	#NV	#NV	#NV	#NV	#NV	#NV	40.0	3.9	2690.0
76	Campbell Canyon	-41.9	174.8	41.9	temperate	active margin	complex	insular	semi-enclosed and enclosed sea	Cook Strait	#NV	200.0	2400.0	47.5	12.0	#NV	560.0	#NV	4.0	21.4	84.8	#NV	3.2	#NV	41.1	#NV	#NV	#NV	#NV	#NV	#NV	#NV	40.0	3.9	2690.0
76	Boo Boo Canyon	-41.8	174.8	41.8	temperate	active margin	complex	insular	semi-enclosed and enclosed sea	Cook Strait	#NV	#NV	#NV	12.1	5.6	#NV	640.0	#NV	2.2	8.8	18.9	#NV	5.7	#NV	32.5	#NV	#NV	#NV	#NV	#NV	#NV	#NV	40.0	3.9	2690.0
76	Palliser Canyon	-41.7	175.2	41.7	temperate	active margin	complex	insular	semi-enclosed and enclosed sea	Cook Strait	#NV	#NV	#NV	22.7	11.9	#NV	600.0	#NV	1.9	19.8	37.8	#NV	3.1	#NV	5.0	#NV	#NV	#NV	#NV	#NV	#NV	#NV	40.0	3.9	2690.0
76	Lower Cook Strait Canyon	-41.7	174.9	41.7	temperate	active margin	complex	insular	semi-enclosed and enclosed sea	Cook Strait	#NV	300.0	1200.0	79.0	14.8	#NV	1200.0	#NV	5.3	12.3	65.8	#NV	1.3	#NV	26.0	#NV	#NV	#NV	#NV	#NV	#NV	#NV	40.0	3.9	2690.0
76	(Upper) Cook Strait Canyon	-41.5	174.6	41.5	temperate	active margin	complex	insular	semi-enclosed and enclosed sea	Cook Strait	shelf-incising	#NV	#NV	50.3	12.7	#NV	440.0	#NV	4.0	28.9	114.3	#NV	1.1	10.0	18.3	#NV	#NV	#NV	#NV	#NV	#NV	#NV	40.0	3.9	2690.0
76	Pahaua Canyon	-41.5	175.7	41.5	temperate	active margin	complex	insular	semi-enclosed and enclosed sea	Cook Strait	shelf-incising	55.0	#NV	45.0	#NV	#NV	#NV	#NV	#NV	#NV	#NV	#NV	#NV	#NV	#NV	#NV	#NV	#NV	#NV	#NV	#NV	#NV	40.0	3.9	2690.0
76	Wairarapa Canyon	-41.4	175.0	41.4	temperate	active margin	complex	insular	semi-enclosed and enclosed sea	Cook Strait	shelf-incising	#NV	#NV	36.0	10.7	#NV	450.0	#NV	3.4	23.8	80.0	#NV	1.3	20.0	1.2	#NV	#NV	#NV	#NV	#NV	#NV	#NV	#NV	#NV	2690.0
76	Nicholson Canyon	-41.4	174.7	41.4	temperate	active margin	complex	insular	semi-enclosed and enclosed sea	Cook Strait	shelf-incising	#NV	#NV	21.3	8.9	#NV	330.0	#NV	2.4	27.0	64.5	#NV	1.3	20.0	6.0	#NV	#NV	#NV	#NV	#NV	#NV	#NV	#NV	#NV	2690.0
77	Mudskipper Canyon	-39.4	148.6	39.4	temperate	passive margin	#NV	continental	semi-enclosed and enclosed sea	Bass Strait	shelf-incising	#NV	#NV	92.3	2.9	#NV	#NV	#NV	31.6	#NV	#NV	1.1	#NV	#NV	158.2	#NV	#NV	#NV	#NV	166.5	#NV	#NV	#NV	#NV	4500.0
77	Moray Canyon	-39.1	148.8	39.1	temperate	passive margin	#NV	continental	semi-enclosed and enclosed sea	Bass Strait	shelf-incising	#NV	#NV	64.3	1.4	#NV	#NV	#NV	45.9	#NV	#NV	1.0	#NV	#NV	145.6	#NV	#NV	#NV	#NV	150.6	#NV	#NV	#NV	#NV	4500.0
77	Pisces Canyon	-38.9	148.7	38.9	temperate	passive margin	#NV	continental	semi-enclosed and enclosed sea	Bass Strait	shelf-incising	#NV	#NV	65.1	2.8	#NV	#NV	#NV	23.7	#NV	#NV	1.1	#NV	#NV	131.3	#NV	#NV	#NV	#NV	139.7	#NV	#NV	#NV	#NV	4500.0
77	Archer Canyon	-38.9	148.6	38.9	temperate	passive margin	#NV	continental	semi-enclosed and enclosed sea	Bass Strait	shelf-incising	#NV	#NV	14.2	1.0	#NV	#NV	#NV	13.7	#NV	#NV	1.2	#NV	#NV	123.2	#NV	#NV	#NV	#NV	122.0	#NV	#NV	#NV	#NV	4500.0
77	Anemone Canyon	-38.8	148.5	38.8	temperate	passive margin	#NV	continental	semi-enclosed and enclosed sea	Bass Strait	shelf-incising	#NV	#NV	53.0	1.8	#NV	#NV	#NV	28.8	#NV	#NV	1.1	#NV	#NV	104.4	#NV	#NV	#NV	#NV	103.5	#NV	#NV	#NV	#NV	4500.0
77	Bass Canyon	-38.6	149.1	38.6	temperate	passive margin	#NV	continental	semi-enclosed and enclosed sea	Bass Strait	slope-confined	3000.0	4000.0	80.0	10.0	#NV	#NV	#NV	8.0	#NV	#NV	1.1	0.8	#NV	97.5	#NV	#NV	#NV	#NV	94.8	#NV	#NV	#NV	#NV	4500.0
77	Shark Canyon	-38.6	149.5	38.6	temperate	passive margin	#NV	continental	semi-enclosed and enclosed sea	Bass Strait	slope-confined	#NV	#NV	16.6	2.2	#NV	#NV	#NV	8.4	#NV	#NV	1.0	#NV	#NV	90.8	#NV	#NV	#NV	#NV	#NV	#NV	#NV	#NV	#NV	4500.0
77	Sole Canyon	-38.5	149.3	38.5	temperate	passive margin	#NV	continental	semi-enclosed and enclosed sea	Bass Strait	slope-confined	#NV	#NV	29.8	1.8	#NV	#NV	#NV	16.8	#NV	#NV	1.0	#NV	#NV	66.9	#NV	#NV	#NV	#NV	#NV	#NV	#NV	#NV	#NV	4500.0
77	Whaleshark Canyon	-38.5	149.2	38.5	temperate	passive margin	#NV	continental	semi-enclosed and enclosed sea	Bass Strait	slope-confined	#NV	#NV	14.2	1.4	#NV	#NV	#NV	12.9	#NV	#NV	1.0	#NV	#NV	67.3	#NV	#NV	#NV	#NV	#NV	#NV	#NV	#NV	#NV	4500.0
77	Everard Canyon	-38.1	149.4	38.1	temperate	passive margin	#NV	continental	semi-enclosed and enclosed sea	Bass Strait	shelf-incising	#NV	#NV	76.9	3.9	#NV	#NV	#NV	19.8	#NV	#NV	1.1	#NV	#NV	30.6	#NV	#NV	#NV	#NV	#NV	#NV	#NV	#NV	#NV	4500.0
78	Akhziv Canyon	33.1	35.1	33.1	temperate	active margin	complex	continental	semi-enclosed and enclosed sea	Mediterranean Sea	shelf-incising	#NV	1200.0	40.0	6.5	#NV	550.0	#NV	6.2	11.8	72.7	#NV	#NV	#NV	3.7	#NV	#NV	#NV	#NV	#NV	#NV	#NV	#NV	#NV	950.0
78	Sour Canyon	33.1	35.0	33.1	temperate	active margin	complex	continental	semi-enclosed and enclosed sea	Mediterranean Sea	shelf-incising	#NV	#NV	#NV	7.0	#NV	500.0	#NV	#NV	14.0	#NV	#NV	#NV	#NV	6.1	#NV	#NV	#NV	#NV	#NV	#NV	#NV	#NV	#NV	950.0
79	Guadiaro Canyon	36.2	-5.2	36.2	temperate	active margin	convergent	continental	semi-enclosed and enclosed sea	Mediterranean Sea	shelf-incising	95.0	550.0	5.0	5.0	#NV	105.0	100.0	1.0	47.6	47.6	#NV	3.1	#NV	4.6	100.0	0.3	1.5	1600.0	4.0	1.4	95.0	10.0	3.4	600.0
79	Eastern Canyon	36.7	-3.5	36.7	temperate	active margin	convergent	continental	semi-enclosed and enclosed sea	Mediterranean Sea	shelf-incising	#NV	#NV	3.0	1.5	#NV	210.0	#NV	2.0	7.1	14.3	1.2	4.3	#NV	1.4	#NV	#NV	#NV	#NV	3.0	1.8	95.0	8.0	4.3	600.0
79	Western Canyon	36.7	-3.5	36.7	temperate	active margin	convergent	continental	semi-enclosed and enclosed sea	Mediterranean Sea	shelf-incising	#NV	#NV	3.0	1.0	#NV	185.0	#NV	3.0	5.4	16.2	1.2	3.1	#NV	2.9	#NV	#NV	#NV	#NV	3.0	1.8	95.0	8.0	4.3	600.0
79	Almeria Canyon	36.7	-2.3	36.7	temperate	active margin	convergent	continental	semi-enclosed and enclosed sea	Mediterranean Sea	shelf-incising	#NV	#NV	57.0	11.0	#NV	150.0	#NV	5.2	73.3	380.0	#NV	1.1	#NV	3.4	74.0	0.0	2.2	2500.0	6.7	0.9	110.0	#NV	#NV	1200.0
80	Cabrera Canyon	37.0	-1.8	37.0	temperate	active margin	convergent	continental	semi-enclosed and enclosed sea	Mediterranean Sea	shelf-incising	7.0	1300.0	10.6	#NV	#NV	#NV	#NV	#NV	#NV	#NV	1.1	9.2	#NV	2.9	100.0	#NV	2.6	#NV	3.0	2.1	110.0	#NV	#NV	#NV
80	Al�as Canyon	37.0	-1.9	37.0	temperate	active margin	convergent	continental	semi-enclosed and enclosed sea	Mediterranean Sea	shelf-incising	14.0	1300.0	12.2	#NV	#NV	#NV	#NV	#NV	#NV	#NV	1.1	9.2	#NV	0.2	100.0	#NV	2.6	#NV	3.6	1.8	110.0	#NV	#NV	#NV
80	Garrucha Canyon	37.2	-1.8	37.2	temperate	active margin	convergent	continental	semi-enclosed and enclosed sea	Mediterranean Sea	shelf-incising	7.0	1100.0	15.7	#NV	#NV	#NV	#NV	#NV	#NV	#NV	1.5	5.0	#NV	1.1	100.0	#NV	2.6	#NV	4.4	1.4	110.0	#NV	#NV	#NV
80	Almanzora Canyon	37.2	-1.7	37.2	temperate	active margin	convergent	continental	semi-enclosed and enclosed sea	Mediterranean Sea	shelf-incising	65.0	1100.0	8.0	#NV	#NV	#NV	#NV	#NV	#NV	#NV	1.1	8.6	#NV	4.2	100.0	#NV	2.6	#NV	5.5	1.1	110.0	#NV	#NV	#NV
81	Menorca Canyon	39.9	4.0	39.9	temperate	active margin	convergent	insular	semi-enclosed and enclosed sea	Mediterranean Sea	shelf-incising	80.0	2400.0	159.7	#NV	#NV	#NV	#NV	#NV	#NV	#NV	1.3	#NV	#NV	5.0	#NV	#NV	#NV	#NV	7.2	#NV	#NV	#NV	#NV	1440.0
82	Orpesa Canyon	40.2	1.1	40.2	temperate	active margin	convergent	continental	semi-enclosed and enclosed sea	Mediterranean Sea	shelf-incising	93.4	939.0	68.0	#NV	#NV	450.0	#NV	#NV	#NV	151.1	1.1	1.8	40.0	58.9	#NV	#NV	#NV	#NV	61.2	#NV	#NV	#NV	#NV	#NV
83	Valldepins Canyon	40.8	1.3	40.8	temperate	active margin	convergent	continental	semi-enclosed and enclosed sea	Mediterranean Sea	shelf-incising	#NV	2026.0	91.7	#NV	#NV	#NV	#NV	#NV	#NV	#NV	#NV	#NV	#NV	26.4	#NV	#NV	#NV	#NV	40.8	0.2	115.0	#NV	4.0	#NV
83	Cunit Canyon	41.1	1.7	41.1	temperate	active margin	convergent	continental	semi-enclosed and enclosed sea	Mediterranean Sea	shelf-incising	83.0	1760.0	58.9	#NV	#NV	#NV	#NV	#NV	#NV	#NV	#NV	#NV	#NV	9.3	#NV	#NV	#NV	#NV	10.2	0.7	115.0	#NV	4.0	#NV
83	Foix Canyon	41.1	1.9	41.1	temperate	active margin	convergent	continental	semi-enclosed and enclosed sea	Mediterranean Sea	shelf-incising	72.0	2180.0	96.7	4.0	#NV	400.0	#NV	24.2	10.0	241.8	1.2	1.5	23.0	11.5	#NV	#NV	#NV	#NV	13.4	0.5	115.0	#NV	4.0	#NV
84	Blanes Canyon	41.7	2.9	41.7	temperate	active margin	convergent	continental	semi-enclosed and enclosed sea	Mediterranean Sea	shelf-incising	70.0	#NV	184.0	20.0	#NV	#NV	#NV	9.2	#NV	#NV	1.5	#NV	#NV	3.8	62.0	#NV	#NV	#NV	22.8	0.4	150.0	#NV	#NV	#NV
85	Palam�s/La Fonera Canyon	42.0	3.3	42.0	temperate	active margin	convergent	continental	semi-enclosed and enclosed sea	Mediterranean Sea	shelf-incising	90.0	#NV	40.0	18.4	#NV	#NV	#NV	2.2	#NV	#NV	1.2	#NV	#NV	3.0	#NV	#NV	#NV	#NV	30.0	#NV	#NV	#NV	#NV	#NV
86	Cap de Creus Canyon	42.4	3.3	42.4	temperate	active margin	convergent	continental	semi-enclosed and enclosed sea	Mediterranean Sea	shelf-incising	125.0	2100.0	96.1	#NV	#NV	800.0	#NV	#NV	#NV	120.1	1.1	#NV	15.0	2.2	#NV	#NV	#NV	#NV	12.9	0.9	200.0	#NV	1.5	#NV
87	Bourcart Canyon	42.8	3.6	42.8	temperate	active margin	convergent	continental	semi-enclosed and enclosed sea	Mediterranean Sea	shelf-incising	110.0	#NV	50.9	4.8	#NV	#NV	#NV	10.6	#NV	#NV	1.1	#NV	#NV	60.0	#NV	#NV	#NV	#NV	64.0	0.1	120.0	#NV	1.5	#NV
88	Mondello Canyon	38.2	13.5	38.2	temperate	active margin	convergent	insular	semi-enclosed and enclosed sea	Mediterranean Sea	slope-confined	356.0	1388.0	7.6	2.2	#NV	298.0	#NV	3.4	7.5	25.5	1.0	7.7	25.0	6.8	#NV	#NV	#NV	#NV	7.3	#NV	#NV	#NV	#NV	3000.0
88	Addaura Canyon	38.2	13.5	38.2	temperate	active margin	convergent	insular	semi-enclosed and enclosed sea	Mediterranean Sea	shelf-incising	123.0	1329.0	9.1	3.5	#NV	297.0	#NV	2.6	11.8	30.6	1.1	7.5	23.0	3.6	#NV	#NV	#NV	#NV	6.2	#NV	#NV	#NV	#NV	3000.0
88	Arenella Canyon	38.2	13.5	38.2	temperate	active margin	convergent	insular	semi-enclosed and enclosed sea	Mediterranean Sea	shelf-incising	112.0	1115.0	6.8	1.9	#NV	113.0	#NV	3.5	17.1	59.7	1.0	8.4	20.0	2.7	#NV	#NV	#NV	#NV	3.4	#NV	#NV	#NV	#NV	3000.0
88	Oreto Canyon	38.2	13.5	38.2	temperate	active margin	convergent	insular	semi-enclosed and enclosed sea	Mediterranean Sea	shelf-incising	120.0	1330.0	13.2	2.2	#NV	299.0	#NV	6.1	7.2	44.1	1.0	5.2	18.0	3.2	21.0	#NV	0.1	1300.0	5.4	#NV	#NV	#NV	#NV	3000.0
88	Eleuterio Canyon	38.2	13.5	38.2	temperate	active margin	convergent	insular	semi-enclosed and enclosed sea	Mediterranean Sea	shelf-incising	120.0	1380.0	13.3	4.5	#NV	425.0	#NV	3.0	10.6	31.3	1.0	5.4	18.0	1.2	#NV	#NV	#NV	#NV	4.9	#NV	#NV	#NV	#NV	3000.0
88	Sperone Canyon	38.2	13.5	38.2	temperate	active margin	convergent	insular	semi-enclosed and enclosed sea	Mediterranean Sea	slope-confined	364.0	1200.0	4.9	1.1	#NV	104.0	#NV	4.7	10.1	47.1	#NV	9.5	22.0	8.0	#NV	#NV	#NV	#NV	4.9	#NV	#NV	#NV	#NV	3000.0
88	Mongerbino tribal valley	38.2	13.5	38.2	temperate	active margin	convergent	insular	semi-enclosed and enclosed sea	Mediterranean Sea	slope-confined	288.0	1160.0	4.4	1.4	#NV	271.0	#NV	3.2	5.0	16.2	#NV	10.8	21.0	3.8	#NV	#NV	#NV	#NV	3.3	#NV	#NV	#NV	#NV	3000.0
89	Castellamare Canyon	38.2	12.9	38.2	temperate	active margin	convergent	insular	semi-enclosed and enclosed sea	Mediterranean Sea	shelf-incising	116.0	2141.0	69.0	1.1	#NV	#NV	#NV	61.6	#NV	#NV	1.2	1.8	25.0	2.0	#NV	#NV	#NV	#NV	6.4	#NV	#NV	#NV	#NV	3000.0
89	Tributary C Canyon	38.2	12.9	38.2	temperate	active margin	convergent	insular	semi-enclosed and enclosed sea	Mediterranean Sea	shelf-incising	135.0	1094.0	22.5	0.7	#NV	#NV	#NV	30.3	#NV	#NV	1.2	2.4	15.9	5.5	#NV	#NV	#NV	#NV	5.8	#NV	#NV	#NV	#NV	3000.0
90	Messina Canyon	38.2	15.6	38.2	temperate	active margin	convergent	#NV	semi-enclosed and enclosed sea	Mediterranean Sea	slope-confined	350.0	1350.0	25.0	#NV	#NV	#NV	#NV	#NV	#NV	#NV	#NV	#NV	35.0	1.1	#NV	#NV	#NV	#NV	#NV	#NV	#NV	#NV	#NV	2900.0
91	Petrace Canyon	38.4	15.8	38.4	temperate	active margin	convergent	continental	semi-enclosed and enclosed sea	Mediterranean Sea	shelf-incising	12.0	450.0	12.3	0.5	#NV	50.0	#NV	24.5	10.0	245.1	1.2	2.4	#NV	0.8	33.0	#NV	0.4	#NV	3.5	2.2	135.0	#NV	2.7	#NV
91	Gioia Canyon	38.4	15.9	38.4	temperate	active margin	convergent	continental	semi-enclosed and enclosed sea	Mediterranean Sea	shelf-incising	8.0	600.0	64.9	1.0	#NV	200.0	#NV	64.9	5.0	324.5	1.2	0.6	#NV	0.3	#NV	#NV	0.1	#NV	3.5	2.2	135.0	#NV	2.7	#NV
91	Mesima Canyon	38.5	15.9	38.5	temperate	active margin	convergent	continental	semi-enclosed and enclosed sea	Mediterranean Sea	shelf-incising	150.0	600.0	40.0	#NV	#NV	#NV	#NV	#NV	#NV	#NV	1.2	1.0	#NV	2.4	47.0	#NV	0.8	#NV	3.5	2.2	135.0	#NV	2.7	#NV
92	Luna Canyon	39.9	15.4	39.9	temperate	active margin	convergent	continental	semi-enclosed and enclosed sea	Mediterranean Sea	shelf-incising	100.0	#NV	13.6	#NV	#NV	#NV	#NV	#NV	#NV	#NV	1.2	3.3	#NV	4.6	#NV	#NV	#NV	#NV	4.5	#NV	#NV	#NV	#NV	#NV
92	Infreschi Canyon	40.0	15.4	40.0	temperate	active margin	convergent	continental	semi-enclosed and enclosed sea	Mediterranean Sea	shelf-incising	50.0	#NV	20.8	#NV	#NV	#NV	#NV	#NV	#NV	#NV	1.7	1.8	#NV	0.8	#NV	#NV	#NV	#NV	4.5	#NV	#NV	#NV	#NV	#NV
93	Dohrn Canyon	40.7	14.2	40.7	temperate	active margin	convergent	continental	semi-enclosed and enclosed sea	Mediterranean Sea	shelf-incising	#NV	#NV	25.0	4.0	#NV	350.0	#NV	6.3	11.4	71.4	#NV	#NV	#NV	8.0	#NV	#NV	#NV	#NV	17.2	0.5	160.0	#NV	#NV	#NV
94	Fium Alto gully	42.5	9.6	42.5	temperate	active margin	convergent	insular	semi-enclosed and enclosed sea	Mediterranean Sea	shelf-incising	120.0	340.0	4.0	0.4	#NV	50.0	#NV	11.4	7.0	80.0	#NV	#NV	#NV	6.4	#NV	#NV	#NV	#NV	7.3	0.9	120.0	#NV	#NV	500.0
94	South Golo Canyon	42.5	9.6	42.5	temperate	active margin	convergent	insular	semi-enclosed and enclosed sea	Mediterranean Sea	shelf-incising	80.0	450.0	6.0	3.5	#NV	170.0	#NV	1.7	20.6	35.3	#NV	3.8	#NV	7.0	90.0	0.5	0.9	1000.0	8.9	0.8	120.0	#NV	#NV	500.0
94	North Golo Canyon	42.6	9.6	42.6	temperate	active margin	convergent	insular	semi-enclosed and enclosed sea	Mediterranean Sea	shelf-incising	80.0	250.0	3.0	1.0	#NV	120.0	120.0	3.0	8.3	25.0	1.0	#NV	#NV	8.5	90.0	0.5	0.9	1000.0	10.5	0.7	120.0	#NV	#NV	500.0
94	Pineto gully	42.6	9.6	42.6	temperate	active margin	convergent	insular	semi-enclosed and enclosed sea	Mediterranean Sea	shelf-incising	120.0	300.0	2.0	0.3	#NV	50.0	#NV	8.0	5.0	40.0	#NV	#NV	#NV	9.4	#NV	#NV	#NV	#NV	10.4	0.7	120.0	#NV	#NV	500.0
94	Biguglia Canyon	42.6	9.6	42.6	temperate	active margin	convergent	insular	semi-enclosed and enclosed sea	Mediterranean Sea	shelf-incising	100.0	200.0	4.0	1.0	#NV	50.0	70.0	4.0	20.0	80.0	1.0	#NV	#NV	8.2	#NV	#NV	#NV	#NV	9.0	0.8	120.0	#NV	#NV	500.0
94	St. Damiano Canyon	42.6	9.6	42.6	temperate	active margin	convergent	insular	semi-enclosed and enclosed sea	Mediterranean Sea	shelf-incising	100.0	200.0	2.0	1.0	#NV	100.0	#NV	2.0	10.0	20.0	1.0	#NV	#NV	6.6	#NV	#NV	#NV	#NV	7.5	0.9	120.0	#NV	#NV	500.0
95	North ?mral? Canyon	40.6	28.5	40.6	temperate	active margin	transform	continental	semi-enclosed and enclosed sea	Sea of Marmara	shelf-incising	100.0	1100.0	34.0	6.0	#NV	#NV	#NV	5.7	#NV	#NV	1.2	#NV	#NV	22.8	#NV	#NV	23.0	2500.0	24.8	0.2	100.0	#NV	10.0	1020.0
96	Sark�y Canyon	40.7	27.4	40.7	temperate	active margin	transform	continental	semi-enclosed and enclosed sea	Sea of Marmara	shelf-incising	80.0	#NV	50.0	#NV	#NV	#NV	#NV	#NV	#NV	#NV	#NV	#NV	#NV	10.0	#NV	#NV	#NV	#NV	#NV	#NV	95.0	#NV	#NV	#NV
96	Izmit Canyon	40.7	29.4	40.7	temperate	active margin	transform	continental	semi-enclosed and enclosed sea	Sea of Marmara	shelf-incising	#NV	#NV	36.0	#NV	#NV	#NV	#NV	#NV	#NV	#NV	#NV	#NV	#NV	1.3	#NV	#NV	#NV	#NV	#NV	#NV	95.0	#NV	#NV	1100.0
97	Danube Canyon	44.1	30.2	44.1	temperate	passive margin	#NV	continental	semi-enclosed and enclosed sea	Black Sea	shelf-incising	110.0	800.0	30.3	6.0	#NV	600.0	#NV	5.1	10.0	50.5	1.1	#NV	30.0	98.6	2900.0	210.0	820.0	4100.0	144.3	0.0	100.0	#NV	#NV	#NV
#NV	#NV	#NV	#NV	#NV	#NV	#NV	#NV	#NV	#NV	#NV	#NV	#NV	#NV	#NV	#NV	#NV	#NV	#NV	#NV	#NV	#NV	#NV	#NV	#NV	#NV	#NV	#NV	#NV	#NV	#NV	#NV	#NV	#NV	#NV	#NV
#NV	#NV	#NV	#NV	#NV	#NV	#NV	#NV	#NV	#NV	#NV	#NV	#NV	#NV	#NV	#NV	#NV	#NV	#NV	#NV	#NV	#NV	#NV	#NV	#NV	#NV	#NV	#NV	#NV	#NV	#NV	#NV	#NV	#NV	#NV	#NV
#NV	#NV	#NV	#NV	#NV	#NV	#NV	#NV	#NV	#NV	#NV	#NV	#NV	#NV	#NV	#NV	#NV	#NV	#NV	#NV	#NV	#NV	#NV	#NV	#NV	#NV	#NV	#NV	#NV	#NV	#NV	#NV	#NV	#NV	#NV	#NV
#NV	#NV	#NV	#NV	#NV	#NV	#NV	#NV	#NV	#NV	#NV	#NV	#NV	#NV	#NV	#NV	#NV	#NV	#NV	#NV	#NV	#NV	#NV	#NV	#NV	#NV	#NV	#NV	#NV	#NV	#NV	#NV	#NV	#NV	#NV	#NV
#NV	#NV	#NV	#NV	#NV	#NV	#NV	#NV	#NV	#NV	#NV	#NV	#NV	#NV	#NV	#NV	#NV	#NV	#NV	#NV	#NV	#NV	#NV	#NV	#NV	#NV	#NV	#NV	#NV	#NV	#NV	#NV	#NV	#NV	#NV	#NV
#NV	#NV	#NV	#NV	#NV	#NV	#NV	#NV	#NV	#NV	#NV	#NV	#NV	#NV	#NV	#NV	#NV	#NV	#NV	#NV	#NV	#NV	#NV	#NV	#NV	#NV	#NV	#NV	#NV	#NV	#NV	#NV	#NV	#NV	#NV	#NV
#NV	#NV	#NV	#NV	#NV	#NV	#NV	#NV	#NV	#NV	#NV	#NV	#NV	#NV	#NV	#NV	#NV	#NV	#NV	#NV	#NV	#NV	#NV	#NV	#NV	#NV	#NV	#NV	#NV	#NV	#NV	#NV	#NV	#NV	#NV	#NV
#NV	#NV	#NV	#NV	#NV	#NV	#NV	#NV	#NV	#NV	#NV	#NV	#NV	#NV	#NV	#NV	#NV	#NV	#NV	#NV	#NV	#NV	#NV	#NV	#NV	#NV	#NV	#NV	#NV	#NV	#NV	#NV	#NV	#NV	#NV	#NV
#NV	#NV	#NV	#NV	#NV	#NV	#NV	#NV	#NV	#NV	#NV	#NV	#NV	#NV	#NV	#NV	#NV	#NV	#NV	#NV	#NV	#NV	#NV	#NV	#NV	#NV	#NV	#NV	#NV	#NV	#NV	#NV	#NV	#NV	#NV	#NV
#NV	#NV	#NV	#NV	#NV	#NV	#NV	#NV	#NV	#NV	#NV	#NV	#NV	#NV	#NV	#NV	#NV	#NV	#NV	#NV	#NV	#NV	#NV	#NV	#NV	#NV	#NV	#NV	#NV	#NV	#NV	#NV	#NV	#NV	#NV	#NV
#NV	#NV	#NV	#NV	#NV	#NV	#NV	#NV	#NV	#NV	#NV	#NV	#NV	#NV	#NV	#NV	#NV	#NV	#NV	#NV	#NV	#NV	#NV	#NV	#NV	#NV	#NV	#NV	#NV	#NV	#NV	#NV	#NV	#NV	#NV	#NV
#NV	#NV	#NV	#NV	#NV	#NV	#NV	#NV	#NV	#NV	#NV	#NV	#NV	#NV	#NV	#NV	#NV	#NV	#NV	#NV	#NV	#NV	#NV	#NV	#NV	#NV	#NV	#NV	#NV	#NV	#NV	#NV	#NV	#NV	#NV	#NV
#NV	#NV	#NV	#NV	#NV	#NV	#NV	#NV	#NV	#NV	#NV	#NV	#NV	#NV	#NV	#NV	#NV	#NV	#NV	#NV	#NV	#NV	#NV	#NV	#NV	#NV	#NV	#NV	#NV	#NV	#NV	#NV	#NV	#NV	#NV	#NV
#NV	#NV	#NV	#NV	#NV	#NV	#NV	#NV	#NV	#NV	#NV	#NV	#NV	#NV	#NV	#NV	#NV	#NV	#NV	#NV	#NV	#NV	#NV	#NV	#NV	#NV	#NV	#NV	#NV	#NV	#NV	#NV	#NV	#NV	#NV	#NV
#NV	#NV	#NV	#NV	#NV	#NV	#NV	#NV	#NV	#NV	#NV	#NV	#NV	#NV	#NV	#NV	#NV	#NV	#NV	#NV	#NV	#NV	#NV	#NV	#NV	#NV	#NV	#NV	#NV	#NV	#NV	#NV	#NV	#NV	#NV	#NV
#NV	#NV	#NV	#NV	#NV	#NV	#NV	#NV	#NV	#NV	#NV	#NV	#NV	#NV	#NV	#NV	#NV	#NV	#NV	#NV	#NV	#NV	#NV	#NV	#NV	#NV	#NV	#NV	#NV	#NV	#NV	#NV	#NV	#NV	#NV	#NV
#NV	#NV	#NV	#NV	#NV	#NV	#NV	#NV	#NV	#NV	#NV	#NV	#NV	#NV	#NV	#NV	#NV	#NV	#NV	#NV	#NV	#NV	#NV	#NV	#NV	#NV	#NV	#NV	#NV	#NV	#NV	#NV	#NV	#NV	#NV	#NV
#NV	#NV	#NV	#NV	#NV	#NV	#NV	#NV	#NV	#NV	#NV	#NV	#NV	#NV	#NV	#NV	#NV	#NV	#NV	#NV	#NV	#NV	#NV	#NV	#NV	#NV	#NV	#NV	#NV	#NV	#NV	#NV	#NV	#NV	#NV	#NV
#NV	#NV	#NV	#NV	#NV	#NV	#NV	#NV	#NV	#NV	#NV	#NV	#NV	#NV	#NV	#NV	#NV	#NV	#NV	#NV	#NV	#NV	#NV	#NV	#NV	#NV	#NV	#NV	#NV	#NV	#NV	#NV	#NV	#NV	#NV	#NV
#NV	#NV	#NV	#NV	#NV	#NV	#NV	#NV	#NV	#NV	#NV	#NV	#NV	#NV	#NV	#NV	#NV	#NV	#NV	#NV	#NV	#NV	#NV	#NV	#NV	#NV	#NV	#NV	#NV	#NV	#NV	#NV	#NV	#NV	#NV	#NV
#NV	#NV	#NV	#NV	#NV	#NV	#NV	#NV	#NV	#NV	#NV	#NV	#NV	#NV	#NV	#NV	#NV	#NV	#NV	#NV	#NV	#NV	#NV	#NV	#NV	#NV	#NV	#NV	#NV	#NV	#NV	#NV	#NV	#NV	#NV	#NV
#NV	#NV	#NV	#NV	#NV	#NV	#NV	#NV	#NV	#NV	#NV	#NV	#NV	#NV	#NV	#NV	#NV	#NV	#NV	#NV	#NV	#NV	#NV	#NV	#NV	#NV	#NV	#NV	#NV	#NV	#NV	#NV	#NV	#NV	#NV	#NV
#NV	#NV	#NV	#NV	#NV	#NV	#NV	#NV	#NV	#NV	#NV	#NV	#NV	#NV	#NV	#NV	#NV	#NV	#NV	#NV	#NV	#NV	#NV	#NV	#NV	#NV	#NV	#NV	#NV	#NV	#NV	#NV	#NV	#NV	#NV	#NV
#NV	#NV	#NV	#NV	#NV	#NV	#NV	#NV	#NV	#NV	#NV	#NV	#NV	#NV	#NV	#NV	#NV	#NV	#NV	#NV	#NV	#NV	#NV	#NV	#NV	#NV	#NV	#NV	#NV	#NV	#NV	#NV	#NV	#NV	#NV	#NV
#NV	#NV	#NV	#NV	#NV	#NV	#NV	#NV	#NV	#NV	#NV	#NV	#NV	#NV	#NV	#NV	#NV	#NV	#NV	#NV	#NV	#NV	#NV	#NV	#NV	#NV	#NV	#NV	#NV	#NV	#NV	#NV	#NV	#NV	#NV	#NV
#NV	#NV	#NV	#NV	#NV	#NV	#NV	#NV	#NV	#NV	#NV	#NV	#NV	#NV	#NV	#NV	#NV	#NV	#NV	#NV	#NV	#NV	#NV	#NV	#NV	#NV	#NV	#NV	#NV	#NV	#NV	#NV	#NV	#NV	#NV	#NV
#NV	#NV	#NV	#NV	#NV	#NV	#NV	#NV	#NV	#NV	#NV	#NV	#NV	#NV	#NV	#NV	#NV	#NV	#NV	#NV	#NV	#NV	#NV	#NV	#NV	#NV	#NV	#NV	#NV	#NV	#NV	#NV	#NV	#NV	#NV	#NV
#NV	#NV	#NV	#NV	#NV	#NV	#NV	#NV	#NV	#NV	#NV	#NV	#NV	#NV	#NV	#NV	#NV	#NV	#NV	#NV	#NV	#NV	#NV	#NV	#NV	#NV	#NV	#NV	#NV	#NV	#NV	#NV	#NV	#NV	#NV	#NV
#NV	#NV	#NV	#NV	#NV	#NV	#NV	#NV	#NV	#NV	#NV	#NV	#NV	#NV	#NV	#NV	#NV	#NV	#NV	#NV	#NV	#NV	#NV	#NV	#NV	#NV	#NV	#NV	#NV	#NV	#NV	#NV	#NV	#NV	#NV	#NV
#NV	#NV	#NV	#NV	#NV	#NV	#NV	#NV	#NV	#NV	#NV	#NV	#NV	#NV	#NV	#NV	#NV	#NV	#NV	#NV	#NV	#NV	#NV	#NV	#NV	#NV	#NV	#NV	#NV	#NV	#NV	#NV	#NV	#NV	#NV	#NV
#NV	#NV	#NV	#NV	#NV	#NV	#NV	#NV	#NV	#NV	#NV	#NV	#NV	#NV	#NV	#NV	#NV	#NV	#NV	#NV	#NV	#NV	#NV	#NV	#NV	#NV	#NV	#NV	#NV	#NV	#NV	#NV	#NV	#NV	#NV	#NV
#NV	#NV	#NV	#NV	#NV	#NV	#NV	#NV	#NV	#NV	#NV	#NV	#NV	#NV	#NV	#NV	#NV	#NV	#NV	#NV	#NV	#NV	#NV	#NV	#NV	#NV	#NV	#NV	#NV	#NV	#NV	#NV	#NV	#NV	#NV	#NV
#NV	#NV	#NV	#NV	#NV	#NV	#NV	#NV	#NV	#NV	#NV	#NV	#NV	#NV	#NV	#NV	#NV	#NV	#NV	#NV	#NV	#NV	#NV	#NV	#NV	#NV	#NV	#NV	#NV	#NV	#NV	#NV	#NV	#NV	#NV	#NV
#NV	#NV	#NV	#NV	#NV	#NV	#NV	#NV	#NV	#NV	#NV	#NV	#NV	#NV	#NV	#NV	#NV	#NV	#NV	#NV	#NV	#NV	#NV	#NV	#NV	#NV	#NV	#NV	#NV	#NV	#NV	#NV	#NV	#NV	#NV	#NV
#NV	#NV	#NV	#NV	#NV	#NV	#NV	#NV	#NV	#NV	#NV	#NV	#NV	#NV	#NV	#NV	#NV	#NV	#NV	#NV	#NV	#NV	#NV	#NV	#NV	#NV	#NV	#NV	#NV	#NV	#NV	#NV	#NV	#NV	#NV	#NV
#NV	#NV	#NV	#NV	#NV	#NV	#NV	#NV	#NV	#NV	#NV	#NV	#NV	#NV	#NV	#NV	#NV	#NV	#NV	#NV	#NV	#NV	#NV	#NV	#NV	#NV	#NV	#NV	#NV	#NV	#NV	#NV	#NV	#NV	#NV	#NV
#NV	#NV	#NV	#NV	#NV	#NV	#NV	#NV	#NV	#NV	#NV	#NV	#NV	#NV	#NV	#NV	#NV	#NV	#NV	#NV	#NV	#NV	#NV	#NV	#NV	#NV	#NV	#NV	#NV	#NV	#NV	#NV	#NV	#NV	#NV	#NV
#NV	#NV	#NV	#NV	#NV	#NV	#NV	#NV	#NV	#NV	#NV	#NV	#NV	#NV	#NV	#NV	#NV	#NV	#NV	#NV	#NV	#NV	#NV	#NV	#NV	#NV	#NV	#NV	#NV	#NV	#NV	#NV	#NV	#NV	#NV	#NV
#NV	#NV	#NV	#NV	#NV	#NV	#NV	#NV	#NV	#NV	#NV	#NV	#NV	#NV	#NV	#NV	#NV	#NV	#NV	#NV	#NV	#NV	#NV	#NV	#NV	#NV	#NV	#NV	#NV	#NV	#NV	#NV	#NV	#NV	#NV	#NV
#NV	#NV	#NV	#NV	#NV	#NV	#NV	#NV	#NV	#NV	#NV	#NV	#NV	#NV	#NV	#NV	#NV	#NV	#NV	#NV	#NV	#NV	#NV	#NV	#NV	#NV	#NV	#NV	#NV	#NV	#NV	#NV	#NV	#NV	#NV	#NV
#NV	#NV	#NV	#NV	#NV	#NV	#NV	#NV	#NV	#NV	#NV	#NV	#NV	#NV	#NV	#NV	#NV	#NV	#NV	#NV	#NV	#NV	#NV	#NV	#NV	#NV	#NV	#NV	#NV	#NV	#NV	#NV	#NV	#NV	#NV	#NV
#NV	#NV	#NV	#NV	#NV	#NV	#NV	#NV	#NV	#NV	#NV	#NV	#NV	#NV	#NV	#NV	#NV	#NV	#NV	#NV	#NV	#NV	#NV	#NV	#NV	#NV	#NV	#NV	#NV	#NV	#NV	#NV	#NV	#NV	#NV	#NV
#NV	#NV	#NV	#NV	#NV	#NV	#NV	#NV	#NV	#NV	#NV	#NV	#NV	#NV	#NV	#NV	#NV	#NV	#NV	#NV	#NV	#NV	#NV	#NV	#NV	#NV	#NV	#NV	#NV	#NV	#NV	#NV	#NV	#NV	#NV	#NV
#NV	#NV	#NV	#NV	#NV	#NV	#NV	#NV	#NV	#NV	#NV	#NV	#NV	#NV	#NV	#NV	#NV	#NV	#NV	#NV	#NV	#NV	#NV	#NV	#NV	#NV	#NV	#NV	#NV	#NV	#NV	#NV	#NV	#NV	#NV	#NV
#NV	#NV	#NV	#NV	#NV	#NV	#NV	#NV	#NV	#NV	#NV	#NV	#NV	#NV	#NV	#NV	#NV	#NV	#NV	#NV	#NV	#NV	#NV	#NV	#NV	#NV	#NV	#NV	#NV	#NV	#NV	#NV	#NV	#NV	#NV	#NV
#NV	#NV	#NV	#NV	#NV	#NV	#NV	#NV	#NV	#NV	#NV	#NV	#NV	#NV	#NV	#NV	#NV	#NV	#NV	#NV	#NV	#NV	#NV	#NV	#NV	#NV	#NV	#NV	#NV	#NV	#NV	#NV	#NV	#NV	#NV	#NV
#NV	#NV	#NV	#NV	#NV	#NV	#NV	#NV	#NV	#NV	#NV	#NV	#NV	#NV	#NV	#NV	#NV	#NV	#NV	#NV	#NV	#NV	#NV	#NV	#NV	#NV	#NV	#NV	#NV	#NV	#NV	#NV	#NV	#NV	#NV	#NV
#NV	#NV	#NV	#NV	#NV	#NV	#NV	#NV	#NV	#NV	#NV	#NV	#NV	#NV	#NV	#NV	#NV	#NV	#NV	#NV	#NV	#NV	#NV	#NV	#NV	#NV	#NV	#NV	#NV	#NV	#NV	#NV	#NV	#NV	#NV	#NV
#NV	#NV	#NV	#NV	#NV	#NV	#NV	#NV	#NV	#NV	#NV	#NV	#NV	#NV	#NV	#NV	#NV	#NV	#NV	#NV	#NV	#NV	#NV	#NV	#NV	#NV	#NV	#NV	#NV	#NV	#NV	#NV	#NV	#NV	#NV	#NV
#NV	#NV	#NV	#NV	#NV	#NV	#NV	#NV	#NV	#NV	#NV	#NV	#NV	#NV	#NV	#NV	#NV	#NV	#NV	#NV	#NV	#NV	#NV	#NV	#NV	#NV	#NV	#NV	#NV	#NV	#NV	#NV	#NV	#NV	#NV	#NV
#NV	#NV	#NV	#NV	#NV	#NV	#NV	#NV	#NV	#NV	#NV	#NV	#NV	#NV	#NV	#NV	#NV	#NV	#NV	#NV	#NV	#NV	#NV	#NV	#NV	#NV	#NV	#NV	#NV	#NV	#NV	#NV	#NV	#NV	#NV	#NV
#NV	#NV	#NV	#NV	#NV	#NV	#NV	#NV	#NV	#NV	#NV	#NV	#NV	#NV	#NV	#NV	#NV	#NV	#NV	#NV	#NV	#NV	#NV	#NV	#NV	#NV	#NV	#NV	#NV	#NV	#NV	#NV	#NV	#NV	#NV	#NV
#NV	#NV	#NV	#NV	#NV	#NV	#NV	#NV	#NV	#NV	#NV	#NV	#NV	#NV	#NV	#NV	#NV	#NV	#NV	#NV	#NV	#NV	#NV	#NV	#NV	#NV	#NV	#NV	#NV	#NV	#NV	#NV	#NV	#NV	#NV	#NV
#NV	#NV	#NV	#NV	#NV	#NV	#NV	#NV	#NV	#NV	#NV	#NV	#NV	#NV	#NV	#NV	#NV	#NV	#NV	#NV	#NV	#NV	#NV	#NV	#NV	#NV	#NV	#NV	#NV	#NV	#NV	#NV	#NV	#NV	#NV	#NV
#NV	#NV	#NV	#NV	#NV	#NV	#NV	#NV	#NV	#NV	#NV	#NV	#NV	#NV	#NV	#NV	#NV	#NV	#NV	#NV	#NV	#NV	#NV	#NV	#NV	#NV	#NV	#NV	#NV	#NV	#NV	#NV	#NV	#NV	#NV	#NV
#NV	#NV	#NV	#NV	#NV	#NV	#NV	#NV	#NV	#NV	#NV	#NV	#NV	#NV	#NV	#NV	#NV	#NV	#NV	#NV	#NV	#NV	#NV	#NV	#NV	#NV	#NV	#NV	#NV	#NV	#NV	#NV	#NV	#NV	#NV	#NV
#NV	#NV	#NV	#NV	#NV	#NV	#NV	#NV	#NV	#NV	#NV	#NV	#NV	#NV	#NV	#NV	#NV	#NV	#NV	#NV	#NV	#NV	#NV	#NV	#NV	#NV	#NV	#NV	#NV	#NV	#NV	#NV	#NV	#NV	#NV	#NV
#NV	#NV	#NV	#NV	#NV	#NV	#NV	#NV	#NV	#NV	#NV	#NV	#NV	#NV	#NV	#NV	#NV	#NV	#NV	#NV	#NV	#NV	#NV	#NV	#NV	#NV	#NV	#NV	#NV	#NV	#NV	#NV	#NV	#NV	#NV	#NV
#NV	#NV	#NV	#NV	#NV	#NV	#NV	#NV	#NV	#NV	#NV	#NV	#NV	#NV	#NV	#NV	#NV	#NV	#NV	#NV	#NV	#NV	#NV	#NV	#NV	#NV	#NV	#NV	#NV	#NV	#NV	#NV	#NV	#NV	#NV	#NV
#NV	#NV	#NV	#NV	#NV	#NV	#NV	#NV	#NV	#NV	#NV	#NV	#NV	#NV	#NV	#NV	#NV	#NV	#NV	#NV	#NV	#NV	#NV	#NV	#NV	#NV	#NV	#NV	#NV	#NV	#NV	#NV	#NV	#NV	#NV	#NV
#NV	#NV	#NV	#NV	#NV	#NV	#NV	#NV	#NV	#NV	#NV	#NV	#NV	#NV	#NV	#NV	#NV	#NV	#NV	#NV	#NV	#NV	#NV	#NV	#NV	#NV	#NV	#NV	#NV	#NV	#NV	#NV	#NV	#NV	#NV	#NV
#NV	#NV	#NV	#NV	#NV	#NV	#NV	#NV	#NV	#NV	#NV	#NV	#NV	#NV	#NV	#NV	#NV	#NV	#NV	#NV	#NV	#NV	#NV	#NV	#NV	#NV	#NV	#NV	#NV	#NV	#NV	#NV	#NV	#NV	#NV	#NV
#NV	#NV	#NV	#NV	#NV	#NV	#NV	#NV	#NV	#NV	#NV	#NV	#NV	#NV	#NV	#NV	#NV	#NV	#NV	#NV	#NV	#NV	#NV	#NV	#NV	#NV	#NV	#NV	#NV	#NV	#NV	#NV	#NV	#NV	#NV	#NV
#NV	#NV	#NV	#NV	#NV	#NV	#NV	#NV	#NV	#NV	#NV	#NV	#NV	#NV	#NV	#NV	#NV	#NV	#NV	#NV	#NV	#NV	#NV	#NV	#NV	#NV	#NV	#NV	#NV	#NV	#NV	#NV	#NV	#NV	#NV	#NV
#NV	#NV	#NV	#NV	#NV	#NV	#NV	#NV	#NV	#NV	#NV	#NV	#NV	#NV	#NV	#NV	#NV	#NV	#NV	#NV	#NV	#NV	#NV	#NV	#NV	#NV	#NV	#NV	#NV	#NV	#NV	#NV	#NV	#NV	#NV	#NV
#NV	#NV	#NV	#NV	#NV	#NV	#NV	#NV	#NV	#NV	#NV	#NV	#NV	#NV	#NV	#NV	#NV	#NV	#NV	#NV	#NV	#NV	#NV	#NV	#NV	#NV	#NV	#NV	#NV	#NV	#NV	#NV	#NV	#NV	#NV	#NV
#NV	#NV	#NV	#NV	#NV	#NV	#NV	#NV	#NV	#NV	#NV	#NV	#NV	#NV	#NV	#NV	#NV	#NV	#NV	#NV	#NV	#NV	#NV	#NV	#NV	#NV	#NV	#NV	#NV	#NV	#NV	#NV	#NV	#NV	#NV	#NV
#NV	#NV	#NV	#NV	#NV	#NV	#NV	#NV	#NV	#NV	#NV	#NV	#NV	#NV	#NV	#NV	#NV	#NV	#NV	#NV	#NV	#NV	#NV	#NV	#NV	#NV	#NV	#NV	#NV	#NV	#NV	#NV	#NV	#NV	#NV	#NV
#NV	#NV	#NV	#NV	#NV	#NV	#NV	#NV	#NV	#NV	#NV	#NV	#NV	#NV	#NV	#NV	#NV	#NV	#NV	#NV	#NV	#NV	#NV	#NV	#NV	#NV	#NV	#NV	#NV	#NV	#NV	#NV	#NV	#NV	#NV	#NV
#NV	#NV	#NV	#NV	#NV	#NV	#NV	#NV	#NV	#NV	#NV	#NV	#NV	#NV	#NV	#NV	#NV	#NV	#NV	#NV	#NV	#NV	#NV	#NV	#NV	#NV	#NV	#NV	#NV	#NV	#NV	#NV	#NV	#NV	#NV	#NV
#NV	#NV	#NV	#NV	#NV	#NV	#NV	#NV	#NV	#NV	#NV	#NV	#NV	#NV	#NV	#NV	#NV	#NV	#NV	#NV	#NV	#NV	#NV	#NV	#NV	#NV	#NV	#NV	#NV	#NV	#NV	#NV	#NV	#NV	#NV	#NV
#NV	#NV	#NV	#NV	#NV	#NV	#NV	#NV	#NV	#NV	#NV	#NV	#NV	#NV	#NV	#NV	#NV	#NV	#NV	#NV	#NV	#NV	#NV	#NV	#NV	#NV	#NV	#NV	#NV	#NV	#NV	#NV	#NV	#NV	#NV	#NV
#NV	#NV	#NV	#NV	#NV	#NV	#NV	#NV	#NV	#NV	#NV	#NV	#NV	#NV	#NV	#NV	#NV	#NV	#NV	#NV	#NV	#NV	#NV	#NV	#NV	#NV	#NV	#NV	#NV	#NV	#NV	#NV	#NV	#NV	#NV	#NV
#NV	#NV	#NV	#NV	#NV	#NV	#NV	#NV	#NV	#NV	#NV	#NV	#NV	#NV	#NV	#NV	#NV	#NV	#NV	#NV	#NV	#NV	#NV	#NV	#NV	#NV	#NV	#NV	#NV	#NV	#NV	#NV	#NV	#NV	#NV	#NV
#NV	#NV	#NV	#NV	#NV	#NV	#NV	#NV	#NV	#NV	#NV	#NV	#NV	#NV	#NV	#NV	#NV	#NV	#NV	#NV	#NV	#NV	#NV	#NV	#NV	#NV	#NV	#NV	#NV	#NV	#NV	#NV	#NV	#NV	#NV	#NV
#NV	#NV	#NV	#NV	#NV	#NV	#NV	#NV	#NV	#NV	#NV	#NV	#NV	#NV	#NV	#NV	#NV	#NV	#NV	#NV	#NV	#NV	#NV	#NV	#NV	#NV	#NV	#NV	#NV	#NV	#NV	#NV	#NV	#NV	#NV	#NV
#NV	#NV	#NV	#NV	#NV	#NV	#NV	#NV	#NV	#NV	#NV	#NV	#NV	#NV	#NV	#NV	#NV	#NV	#NV	#NV	#NV	#NV	#NV	#NV	#NV	#NV	#NV	#NV	#NV	#NV	#NV	#NV	#NV	#NV	#NV	#NV
#NV	#NV	#NV	#NV	#NV	#NV	#NV	#NV	#NV	#NV	#NV	#NV	#NV	#NV	#NV	#NV	#NV	#NV	#NV	#NV	#NV	#NV	#NV	#NV	#NV	#NV	#NV	#NV	#NV	#NV	#NV	#NV	#NV	#NV	#NV	#NV
#NV	#NV	#NV	#NV	#NV	#NV	#NV	#NV	#NV	#NV	#NV	#NV	#NV	#NV	#NV	#NV	#NV	#NV	#NV	#NV	#NV	#NV	#NV	#NV	#NV	#NV	#NV	#NV	#NV	#NV	#NV	#NV	#NV	#NV	#NV	#NV
#NV	#NV	#NV	#NV	#NV	#NV	#NV	#NV	#NV	#NV	#NV	#NV	#NV	#NV	#NV	#NV	#NV	#NV	#NV	#NV	#NV	#NV	#NV	#NV	#NV	#NV	#NV	#NV	#NV	#NV	#NV	#NV	#NV	#NV	#NV	#NV
#NV	#NV	#NV	#NV	#NV	#NV	#NV	#NV	#NV	#NV	#NV	#NV	#NV	#NV	#NV	#NV	#NV	#NV	#NV	#NV	#NV	#NV	#NV	#NV	#NV	#NV	#NV	#NV	#NV	#NV	#NV	#NV	#NV	#NV	#NV	#NV
#NV	#NV	#NV	#NV	#NV	#NV	#NV	#NV	#NV	#NV	#NV	#NV	#NV	#NV	#NV	#NV	#NV	#NV	#NV	#NV	#NV	#NV	#NV	#NV	#NV	#NV	#NV	#NV	#NV	#NV	#NV	#NV	#NV	#NV	#NV	#NV
#NV	#NV	#NV	#NV	#NV	#NV	#NV	#NV	#NV	#NV	#NV	#NV	#NV	#NV	#NV	#NV	#NV	#NV	#NV	#NV	#NV	#NV	#NV	#NV	#NV	#NV	#NV	#NV	#NV	#NV	#NV	#NV	#NV	#NV	#NV	#NV
#NV	#NV	#NV	#NV	#NV	#NV	#NV	#NV	#NV	#NV	#NV	#NV	#NV	#NV	#NV	#NV	#NV	#NV	#NV	#NV	#NV	#NV	#NV	#NV	#NV	#NV	#NV	#NV	#NV	#NV	#NV	#NV	#NV	#NV	#NV	#NV
#NV	#NV	#NV	#NV	#NV	#NV	#NV	#NV	#NV	#NV	#NV	#NV	#NV	#NV	#NV	#NV	#NV	#NV	#NV	#NV	#NV	#NV	#NV	#NV	#NV	#NV	#NV	#NV	#NV	#NV	#NV	#NV	#NV	#NV	#NV	#NV
#NV	#NV	#NV	#NV	#NV	#NV	#NV	#NV	#NV	#NV	#NV	#NV	#NV	#NV	#NV	#NV	#NV	#NV	#NV	#NV	#NV	#NV	#NV	#NV	#NV	#NV	#NV	#NV	#NV	#NV	#NV	#NV	#NV	#NV	#NV	#NV
#NV	#NV	#NV	#NV	#NV	#NV	#NV	#NV	#NV	#NV	#NV	#NV	#NV	#NV	#NV	#NV	#NV	#NV	#NV	#NV	#NV	#NV	#NV	#NV	#NV	#NV	#NV	#NV	#NV	#NV	#NV	#NV	#NV	#NV	#NV	#NV
#NV	#NV	#NV	#NV	#NV	#NV	#NV	#NV	#NV	#NV	#NV	#NV	#NV	#NV	#NV	#NV	#NV	#NV	#NV	#NV	#NV	#NV	#NV	#NV	#NV	#NV	#NV	#NV	#NV	#NV	#NV	#NV	#NV	#NV	#NV	#NV
#NV	#NV	#NV	#NV	#NV	#NV	#NV	#NV	#NV	#NV	#NV	#NV	#NV	#NV	#NV	#NV	#NV	#NV	#NV	#NV	#NV	#NV	#NV	#NV	#NV	#NV	#NV	#NV	#NV	#NV	#NV	#NV	#NV	#NV	#NV	#NV
#NV	#NV	#NV	#NV	#NV	#NV	#NV	#NV	#NV	#NV	#NV	#NV	#NV	#NV	#NV	#NV	#NV	#NV	#NV	#NV	#NV	#NV	#NV	#NV	#NV	#NV	#NV	#NV	#NV	#NV	#NV	#NV	#NV	#NV	#NV	#NV
#NV	#NV	#NV	#NV	#NV	#NV	#NV	#NV	#NV	#NV	#NV	#NV	#NV	#NV	#NV	#NV	#NV	#NV	#NV	#NV	#NV	#NV	#NV	#NV	#NV	#NV	#NV	#NV	#NV	#NV	#NV	#NV	#NV	#NV	#NV	#NV
#NV	#NV	#NV	#NV	#NV	#NV	#NV	#NV	#NV	#NV	#NV	#NV	#NV	#NV	#NV	#NV	#NV	#NV	#NV	#NV	#NV	#NV	#NV	#NV	#NV	#NV	#NV	#NV	#NV	#NV	#NV	#NV	#NV	#NV	#NV	#NV
#NV	#NV	#NV	#NV	#NV	#NV	#NV	#NV	#NV	#NV	#NV	#NV	#NV	#NV	#NV	#NV	#NV	#NV	#NV	#NV	#NV	#NV	#NV	#NV	#NV	#NV	#NV	#NV	#NV	#NV	#NV	#NV	#NV	#NV	#NV	#NV
#NV	#NV	#NV	#NV	#NV	#NV	#NV	#NV	#NV	#NV	#NV	#NV	#NV	#NV	#NV	#NV	#NV	#NV	#NV	#NV	#NV	#NV	#NV	#NV	#NV	#NV	#NV	#NV	#NV	#NV	#NV	#NV	#NV	#NV	#NV	#NV
#NV	#NV	#NV	#NV	#NV	#NV	#NV	#NV	#NV	#NV	#NV	#NV	#NV	#NV	#NV	#NV	#NV	#NV	#NV	#NV	#NV	#NV	#NV	#NV	#NV	#NV	#NV	#NV	#NV	#NV	#NV	#NV	#NV	#NV	#NV	#NV
#NV	#NV	#NV	#NV	#NV	#NV	#NV	#NV	#NV	#NV	#NV	#NV	#NV	#NV	#NV	#NV	#NV	#NV	#NV	#NV	#NV	#NV	#NV	#NV	#NV	#NV	#NV	#NV	#NV	#NV	#NV	#NV	#NV	#NV	#NV	#NV
#NV	#NV	#NV	#NV	#NV	#NV	#NV	#NV	#NV	#NV	#NV	#NV	#NV	#NV	#NV	#NV	#NV	#NV	#NV	#NV	#NV	#NV	#NV	#NV	#NV	#NV	#NV	#NV	#NV	#NV	#NV	#NV	#NV	#NV	#NV	#NV
#NV	#NV	#NV	#NV	#NV	#NV	#NV	#NV	#NV	#NV	#NV	#NV	#NV	#NV	#NV	#NV	#NV	#NV	#NV	#NV	#NV	#NV	#NV	#NV	#NV	#NV	#NV	#NV	#NV	#NV	#NV	#NV	#NV	#NV	#NV	#NV
#NV	#NV	#NV	#NV	#NV	#NV	#NV	#NV	#NV	#NV	#NV	#NV	#NV	#NV	#NV	#NV	#NV	#NV	#NV	#NV	#NV	#NV	#NV	#NV	#NV	#NV	#NV	#NV	#NV	#NV	#NV	#NV	#NV	#NV	#NV	#NV
#NV	#NV	#NV	#NV	#NV	#NV	#NV	#NV	#NV	#NV	#NV	#NV	#NV	#NV	#NV	#NV	#NV	#NV	#NV	#NV	#NV	#NV	#NV	#NV	#NV	#NV	#NV	#NV	#NV	#NV	#NV	#NV	#NV	#NV	#NV	#NV
#NV	#NV	#NV	#NV	#NV	#NV	#NV	#NV	#NV	#NV	#NV	#NV	#NV	#NV	#NV	#NV	#NV	#NV	#NV	#NV	#NV	#NV	#NV	#NV	#NV	#NV	#NV	#NV	#NV	#NV	#NV	#NV	#NV	#NV	#NV	#NV
#NV	#NV	#NV	#NV	#NV	#NV	#NV	#NV	#NV	#NV	#NV	#NV	#NV	#NV	#NV	#NV	#NV	#NV	#NV	#NV	#NV	#NV	#NV	#NV	#NV	#NV	#NV	#NV	#NV	#NV	#NV	#NV	#NV	#NV	#NV	#NV
#NV	#NV	#NV	#NV	#NV	#NV	#NV	#NV	#NV	#NV	#NV	#NV	#NV	#NV	#NV	#NV	#NV	#NV	#NV	#NV	#NV	#NV	#NV	#NV	#NV	#NV	#NV	#NV	#NV	#NV	#NV	#NV	#NV	#NV	#NV	#NV
#NV	#NV	#NV	#NV	#NV	#NV	#NV	#NV	#NV	#NV	#NV	#NV	#NV	#NV	#NV	#NV	#NV	#NV	#NV	#NV	#NV	#NV	#NV	#NV	#NV	#NV	#NV	#NV	#NV	#NV	#NV	#NV	#NV	#NV	#NV	#NV
#NV	#NV	#NV	#NV	#NV	#NV	#NV	#NV	#NV	#NV	#NV	#NV	#NV	#NV	#NV	#NV	#NV	#NV	#NV	#NV	#NV	#NV	#NV	#NV	#NV	#NV	#NV	#NV	#NV	#NV	#NV	#NV	#NV	#NV	#NV	#NV
#NV	#NV	#NV	#NV	#NV	#NV	#NV	#NV	#NV	#NV	#NV	#NV	#NV	#NV	#NV	#NV	#NV	#NV	#NV	#NV	#NV	#NV	#NV	#NV	#NV	#NV	#NV	#NV	#NV	#NV	#NV	#NV	#NV	#NV	#NV	#NV
#NV	#NV	#NV	#NV	#NV	#NV	#NV	#NV	#NV	#NV	#NV	#NV	#NV	#NV	#NV	#NV	#NV	#NV	#NV	#NV	#NV	#NV	#NV	#NV	#NV	#NV	#NV	#NV	#NV	#NV	#NV	#NV	#NV	#NV	#NV	#NV
#NV	#NV	#NV	#NV	#NV	#NV	#NV	#NV	#NV	#NV	#NV	#NV	#NV	#NV	#NV	#NV	#NV	#NV	#NV	#NV	#NV	#NV	#NV	#NV	#NV	#NV	#NV	#NV	#NV	#NV	#NV	#NV	#NV	#NV	#NV	#NV
#NV	#NV	#NV	#NV	#NV	#NV	#NV	#NV	#NV	#NV	#NV	#NV	#NV	#NV	#NV	#NV	#NV	#NV	#NV	#NV	#NV	#NV	#NV	#NV	#NV	#NV	#NV	#NV	#NV	#NV	#NV	#NV	#NV	#NV	#NV	#NV
